# Supplementary material for: Gasdermin-E-mediated pyroptosis drives immune checkpoint inhibitor-associated myocarditis via cGAS-STING activation
Source: PubMed Central journal article supplement — Nat Commun. 2024 Aug 5;15:6640. doi: 10.1038/s41467-024-50996-5 (PMC11300882; doi:10.1038/s41467-024-50996-5), 2024-08-05
Supplement: 41467_2024_50996_MOESM1_ESM.pdf [file 41467_2024_50996_MOESM1_ESM.pdf]

1 **Supplemental Figure 1**

2

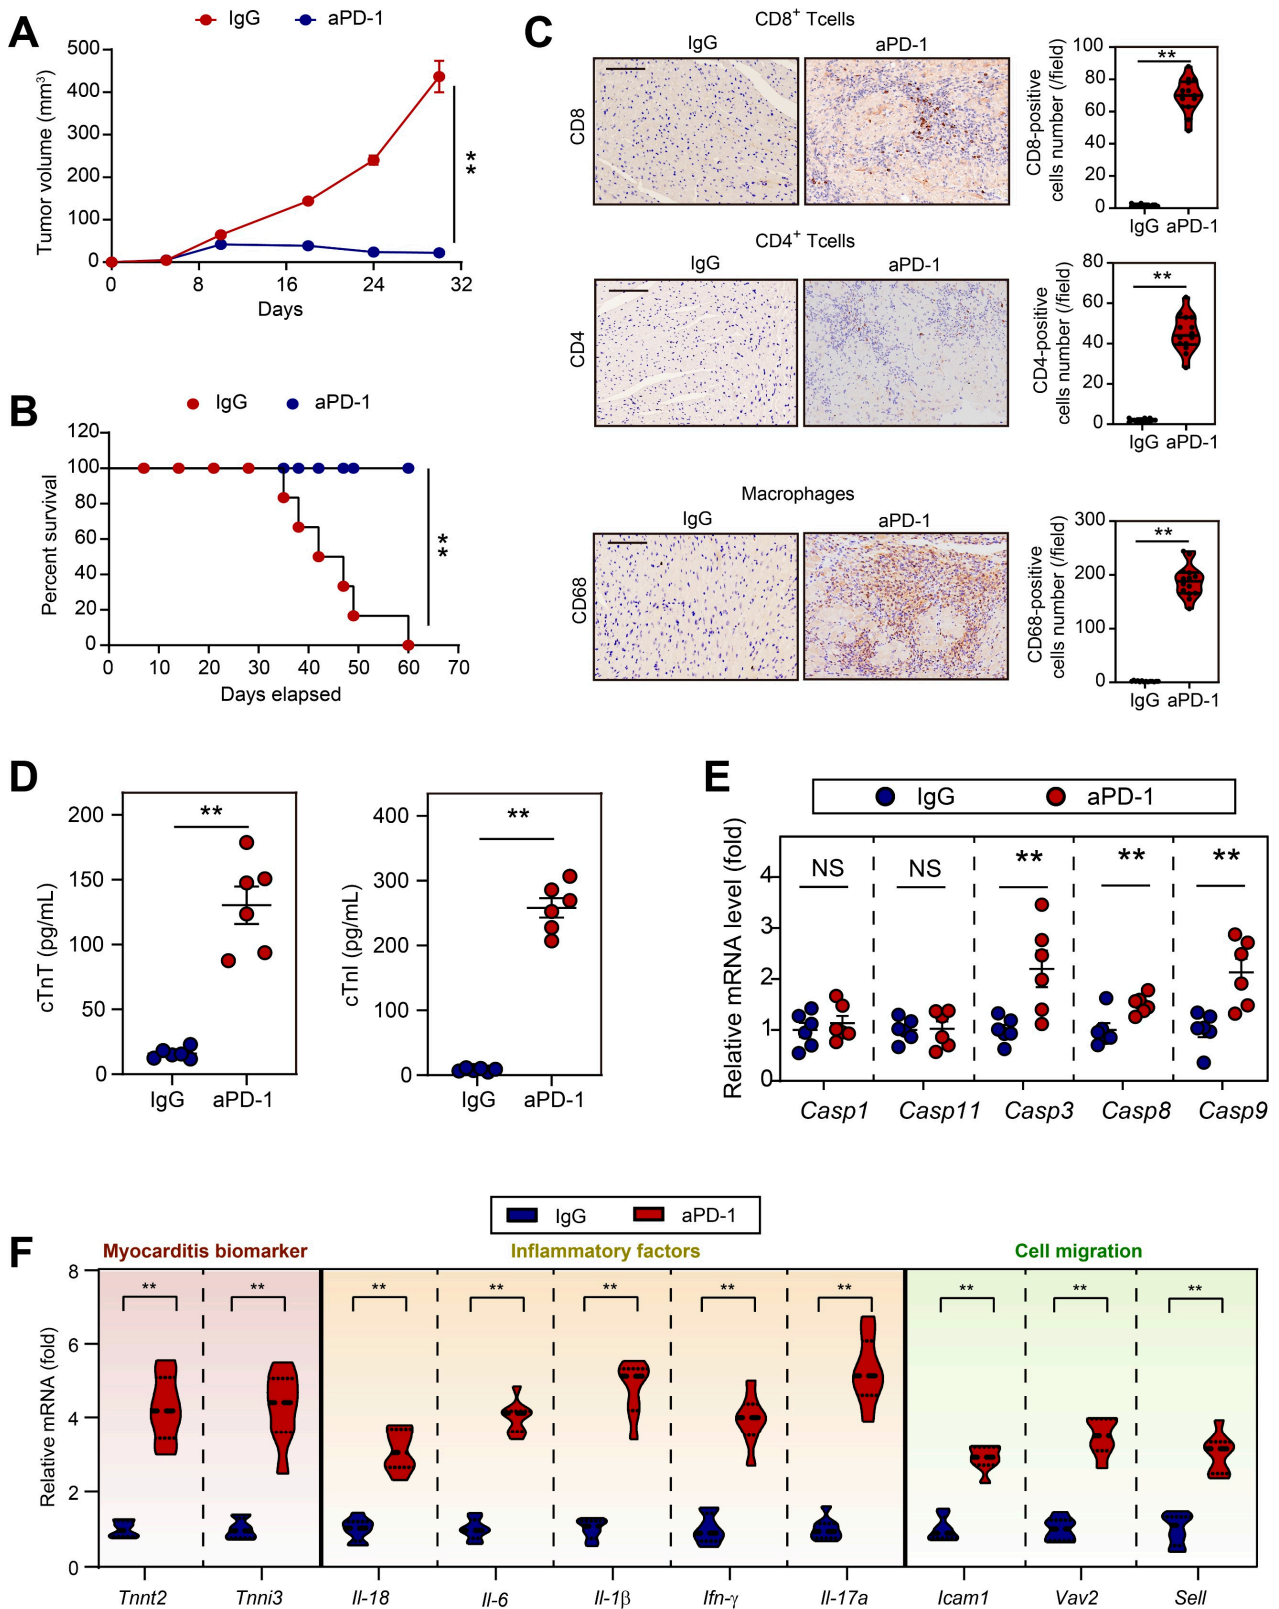

3 **Overdose anti-PD-1 (aPD-1) therapy in mice inhibits tumor growth but causes myocardial**  
 4 **immune cells infiltration and elevation of blood biomarkers.**

5 (A) Tumor size in tumor-bearing mice received overdose aPD-1 therapy or normal IgG. *n* = 6  
 6 biologically independent experiments.  
 7

8 (B) Survival of tumor-bearing mice received overdose aPD-1 therapy or normal IgG.  $n = 6$  biologically  
9 independent experiments.

10 (C) Immunohistochemistry staining of T-cell (CD8<sup>+</sup> and CD4<sup>+</sup>) and macrophages/monocytes (CD68<sup>+</sup>)  
11 in myocardium of mice received overdose aPD-1 therapy or normal IgG.  $n = 14$  biologically  
12 independent experiments.

13 (D) Serum levels of cTnT and cTnl in mice received overdose aPD-1 therapy or normal IgG.  $n = 6$   
14 biologically independent experiments.

15 (E) Gene expression of *caspase-1*, *caspase-11*, *caspase-3*, *caspase-8* and *caspase-9* in heart of  
16 mice received overdose aPD-1 therapy or normal IgG.  $n = 6$  biologically independent experiments.

17 (F) Gene expression of *Tnni3*, *Tnnt2*, *Il-18*, *Il-6*, *Il-1b*, *lfn- $\gamma$* , *Il-17a*, *Icam1*, *Vav2* and *Sell* in heart of  
18 mice received overdose aPD-1 therapy or normal IgG.  $n = 8$  biologically independent experiments.

19 The data were presented as means  $\pm$  SEM and analyzed by Log-Rank test (survival, B) and two-  
20 sided unpaired Student's t-test (other panels). \*\* $P < 0.01$ . NS, no significance.

21 **Supplemental Figure 2**

22

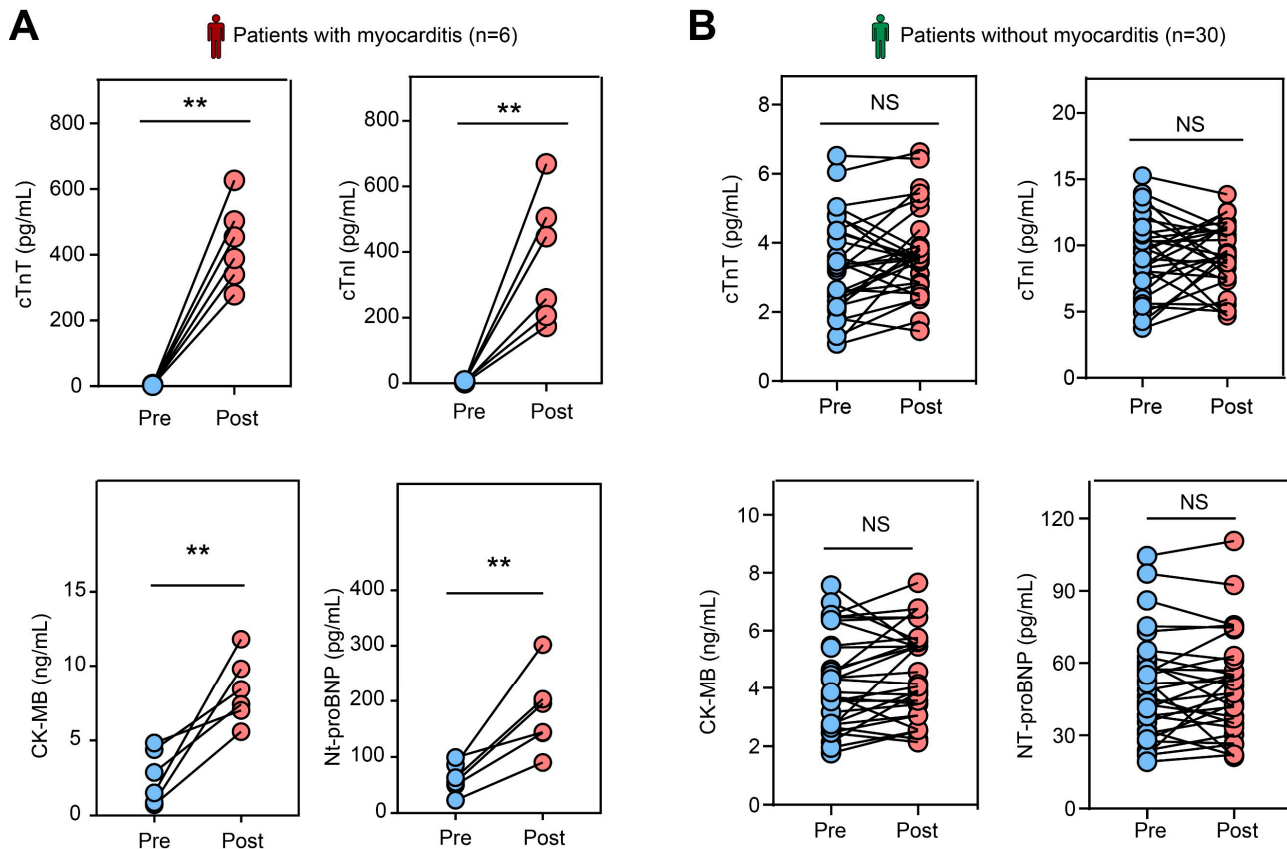

23

24

25 **Investigation of serum biomarkers for cardiac injury in patients with aPD-1 therapy-induced**  
26 **myocarditis.**

27 **(A)** Serum biomarkers of cardiac damage (cTnT, cTnI, CK-MB and NT-proBNP) in 6 NSCLC patients  
28 with myocarditis (IC-OS 2021 criteria).

29 **(B)** Serum biomarkers of cardiac damage (cTnT, cTnI, CK-MB and NT-proBNP) in 30 NSCLC  
30 patients without myocarditis (IC-OS 2021 criteria).

31 The data were analyzed by two-sided paired Student's t-test. \*\* $P < 0.01$ . NS, no significance.

32 **Supplemental Figure 3**

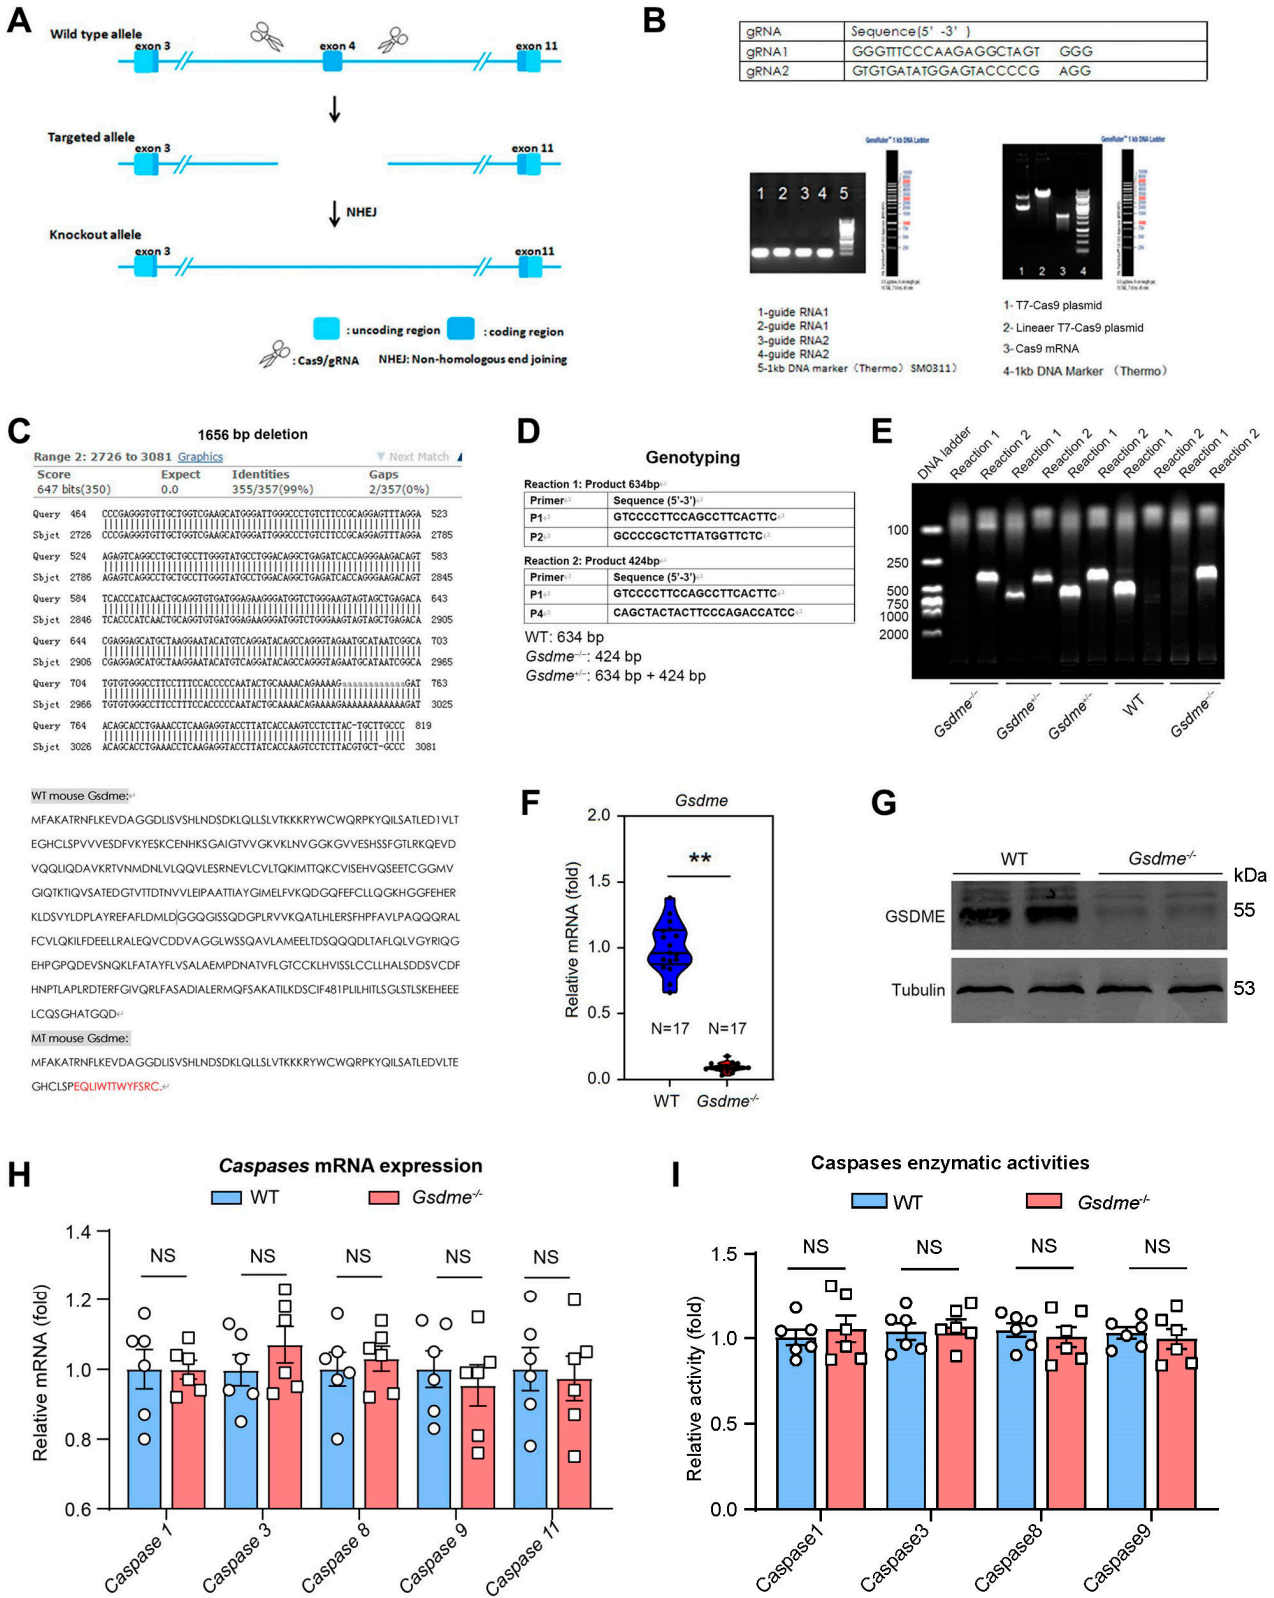

33 **Generation of a mouse strain with globally knockout of GSDME.**

34 (A) Schematic diagram showing the knockout strategy in mice by targeting exon 4 of GSDME using  
35 CRISPR/CAS9 technology.

36 (B) Design and preparation of gRNAs.

37 (C) Sequencing confirmation of the deletion of 1656 bp in F0 animal.

38 (D) Genotyping primers of genotyping in F1 animals.

40 (E) The representative agarose images in genotyping.  
41 (F) The mRNA level of GSDME in WT and *Gsdme*<sup>-/-</sup> mice. The primers were designed to target the  
42 gene sequence within the exon 4 of GSDME. *n* = 17 biologically independent experiments.  
43 (G) Immunoblotting analysis confirmed the successful deletion of GSDME protein in *Gsdme*<sup>-/-</sup> mice.  
44 (H) The mRNA expression of *caspase 1*, *caspase 3*, *caspase 8*, *caspase 9* and *caspase 11* in hear  
45 tissue of WT and *Gsdme*<sup>-/-</sup> mice. *n* = 6 biologically independent experiments.  
46 (I) The enzymatic activities of Caspase 1, Caspase 3, Caspase 8 and Caspase 9 in heart tissue of  
47 WT and *Gsdme*<sup>-/-</sup> mice. *n* = 6 biologically independent experiments.  
48 The data were presented as means ± SEM and analyzed by two-sided unpaired Student's t-tests.  
49 \*\**P*<0.01. NS, no significance.

## Supplemental Figure 4

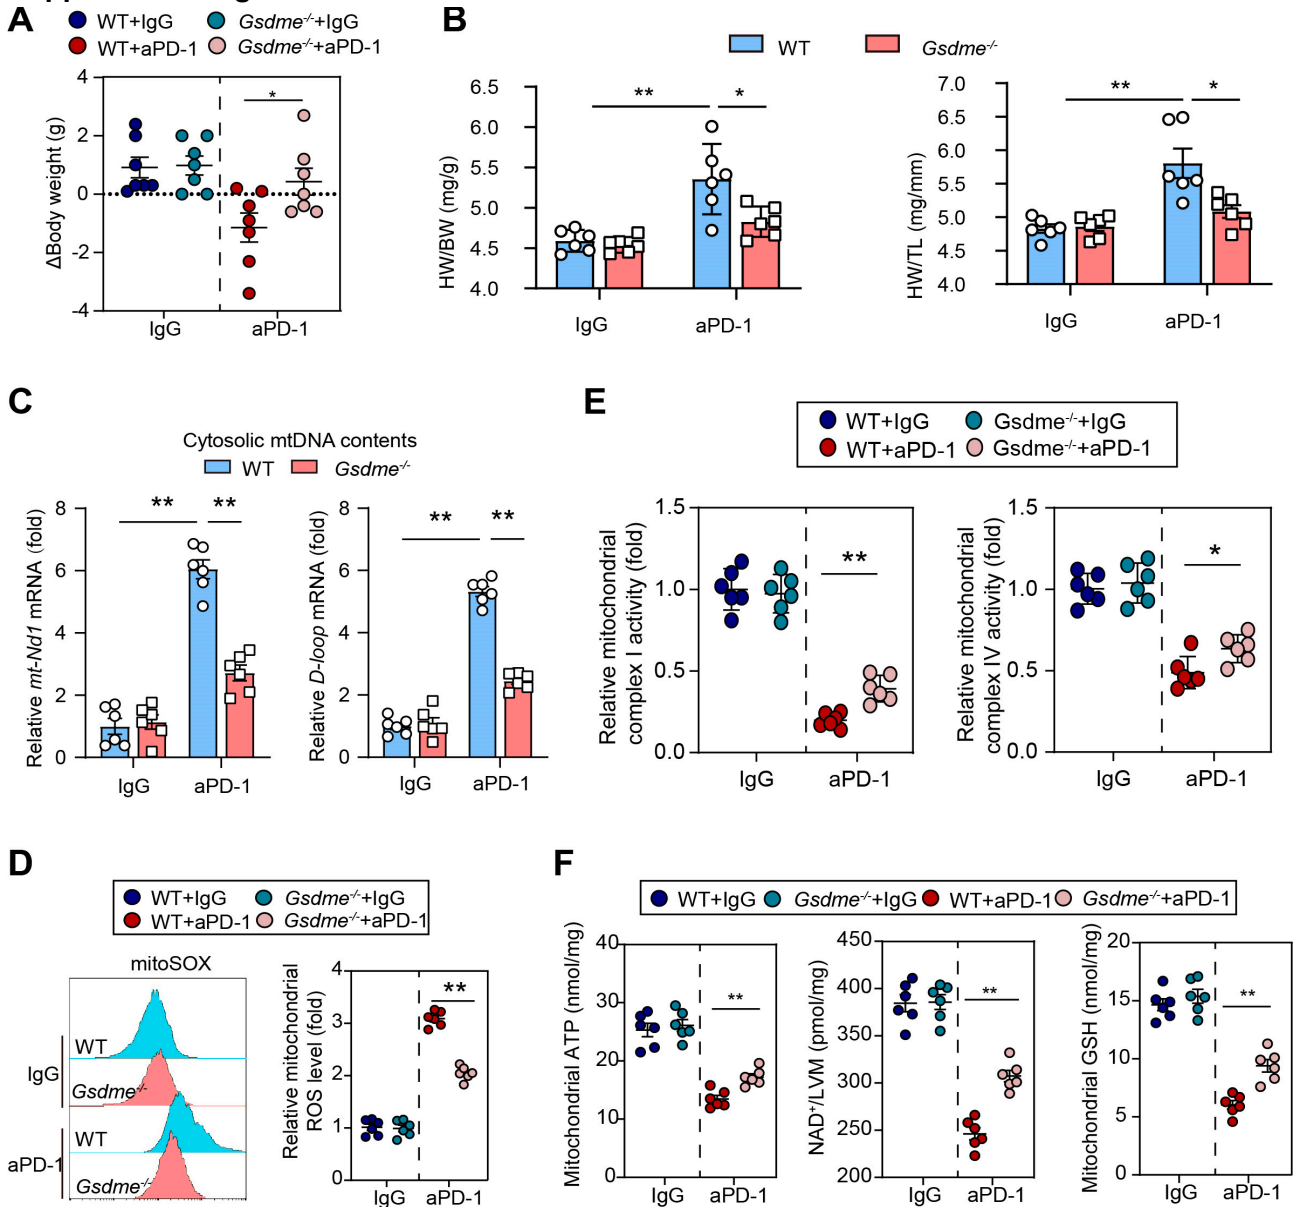

51

52

53

54

### Deletion of GSDME in mice attenuates aPD-1 therapy-induced myocardial damage and mitochondrial dysfunction.

55

(A) The body weight change induced by aPD-1 therapy in WT and *Gsdme*<sup>-/-</sup> mice. Normal IgG was used as a control. *n* = 7 biologically independent experiments.

57

(B) Heart weight to body weight ratio (HW/BW) and heart weight to tibia length ratio (HW/TL). *n* = 6 biologically independent experiments.

59

(C) Cytosolic mtDNA (*mt-Nd1* and *D-loop*) contents in heart of WT and *Gsdme*<sup>-/-</sup> mice received aPD-1 therapy or control IgG. *n* = 6 biologically independent experiments.

61

(D) Mitochondrial ROS levels were determined using flow cytometry with mitoSOX probe in single cells extracted from heart tissues of WT and *Gsdme*<sup>-/-</sup> mice after treatment of aPD-1 or normal IgG. *n* = 6 biologically independent experiments.

64

(E) Quantitative analysis of mitochondrial complex I and IV activities in heart of WT and *Gsdme*<sup>-/-</sup> mice received aPD-1 therapy or control IgG. *n* = 6 biologically independent experiments. *n* = 6 biologically independent experiments.

67

(F) Mitochondrial contents of ATP, NAD<sup>+</sup> and GSH in mitochondrial fractions extracted from heart

68 tissues of WT and *Gsdme*<sup>-/-</sup> mice after treatment of aPD-1 or normal IgG. *n* = 6 biologically  
69 independent experiments.  
70 The data were presented as means ± SEM and analyzed by two-sided unpaired Student's t-tests.  
71 \**P* < 0.05, \*\**P* < 0.01. NS, no significance.  
72

73 **Supplemental Fig 5**

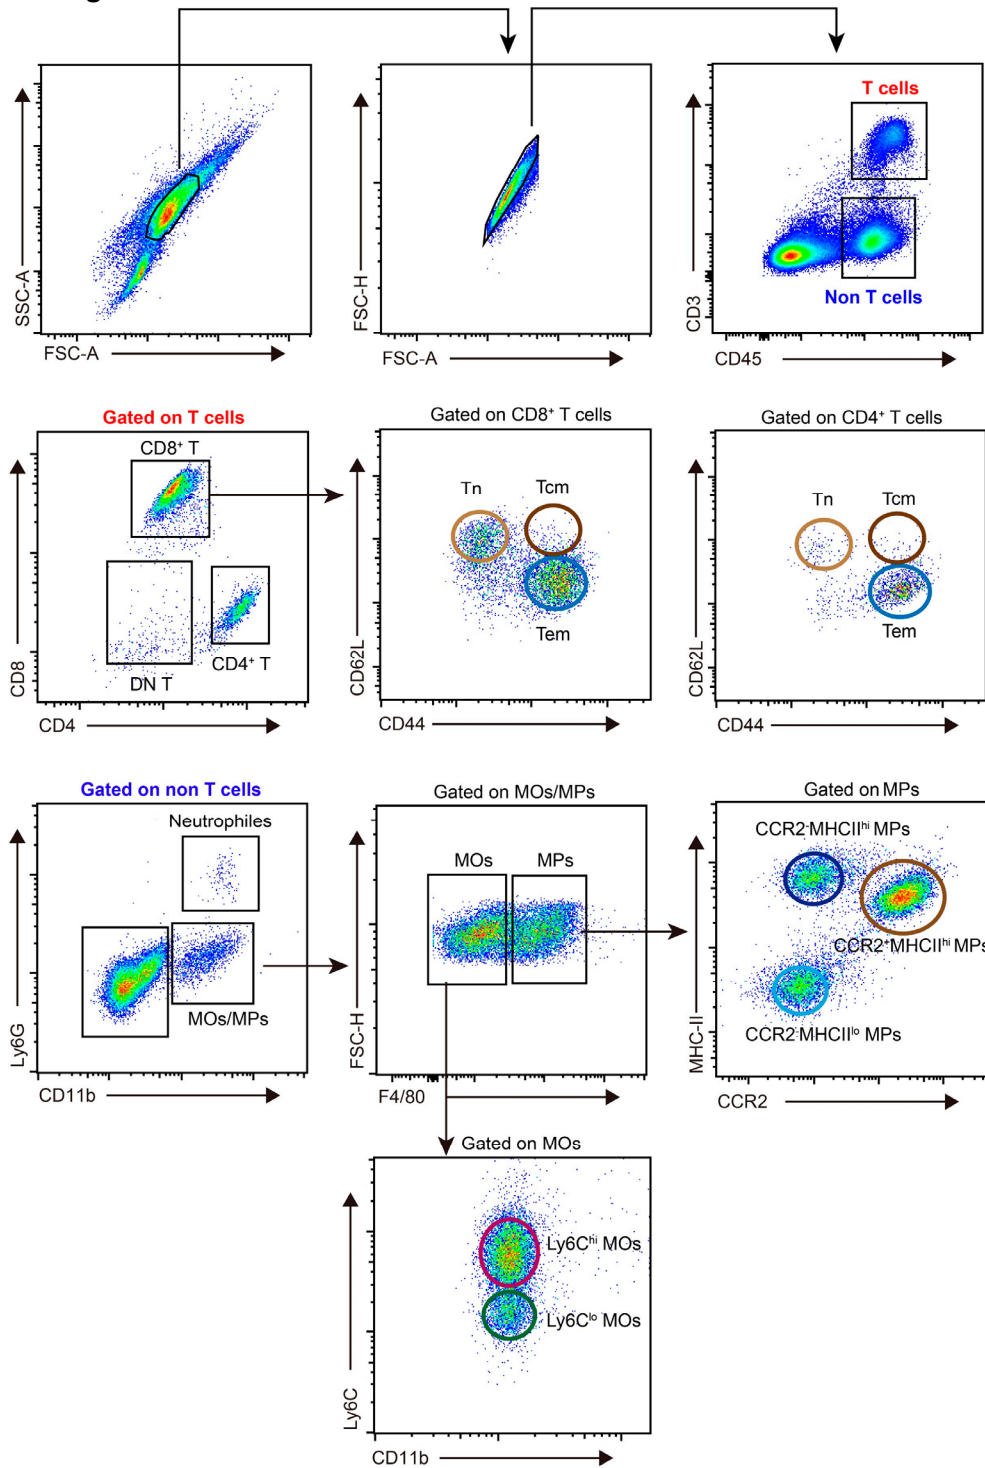

74

75

76 **Gating strategy of flow cytometry.** The gating strategy of flow cytometry in cells isolated from  
 77 hearts of mice received aPD-1 therapy was presented.

78



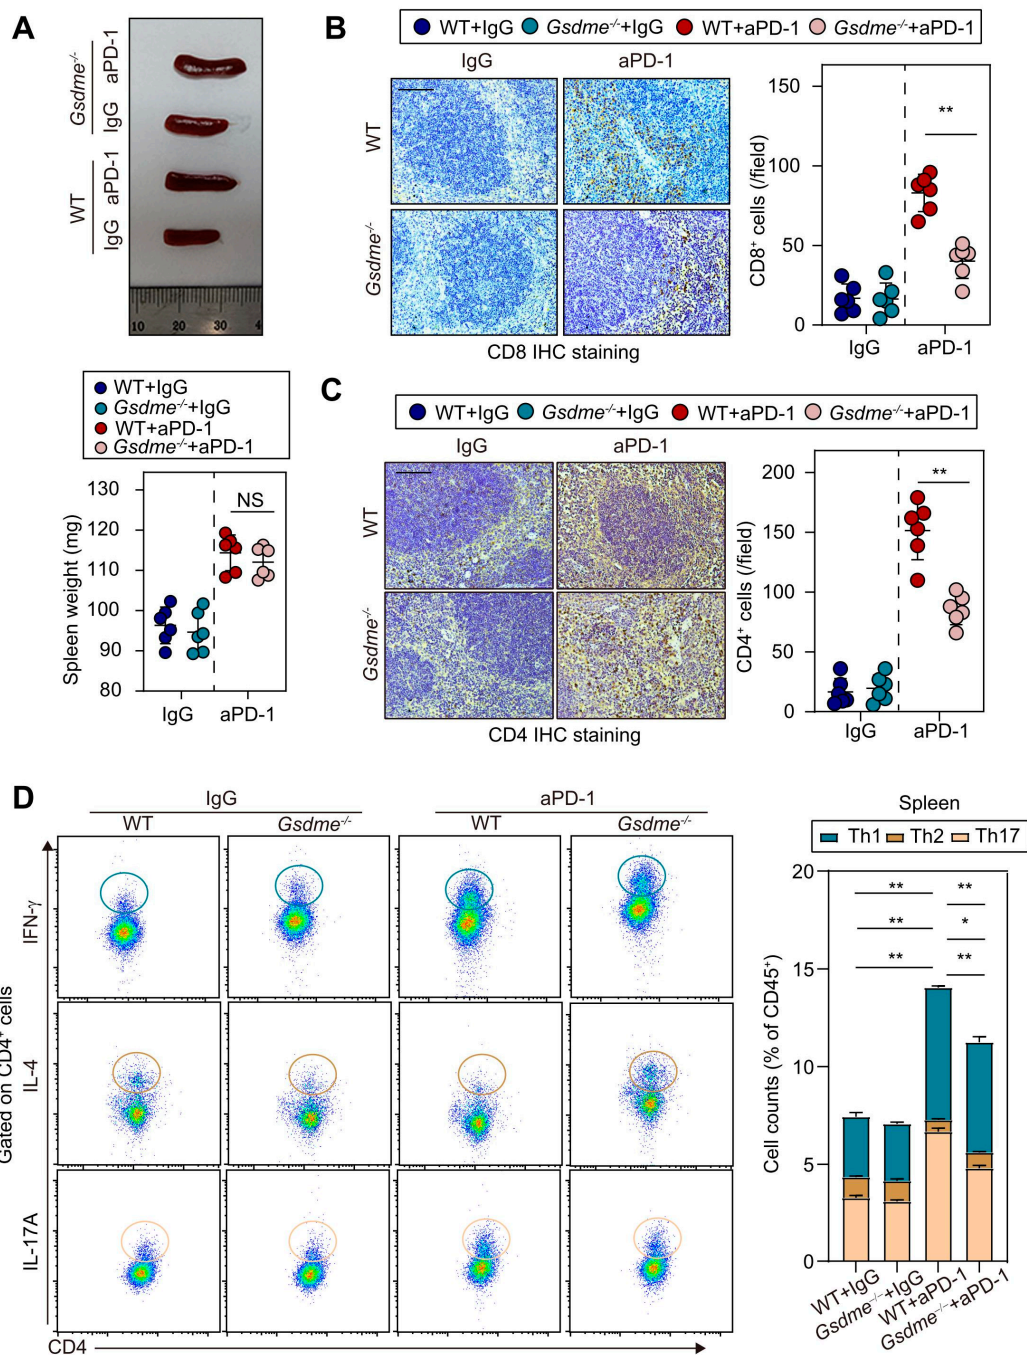

81

### 82 Deletion of GSDME in mice weakens aPD-1 therapy-induced T-cells activation in spleen

83 (A) Morphology and spleen weight of WT and *Gsdme*<sup>-/-</sup> mice received aPD-1 therapy or normal IgG.

84 (B) Representative immunohistochemistry staining and quantitative analysis of CD8<sup>+</sup> T-cells in  
85 spleen of WT and *Gsdme*<sup>-/-</sup> mice received aPD-1 therapy or control IgG.

86 (C) Representative immunohistochemistry staining and quantitative analysis of CD4<sup>+</sup> T-cells in  
87 spleen of WT and *Gsdme*<sup>-/-</sup> mice received aPD-1 therapy or control IgG.

88 (D) Proportions of Th1 (IFN- $\gamma$ <sup>+</sup>), Th2 (IL-4<sup>+</sup>) and Th17 (IL-17A<sup>+</sup>) cells within CD4<sup>+</sup> cells in spleens of  
89 WT and *Gsdme*<sup>-/-</sup> mice were determined using flow cytometry analysis.

90 The data were presented as means  $\pm$  SEM and analyzed by two-sided unpaired Student's t-tests.

91 \* $P$ <0.05, \*\* $P$ <0.01. NS, no significance.  $n$  = 6 biologically independent experiments.

92

93

94  
95

## Supplemental Figure 7

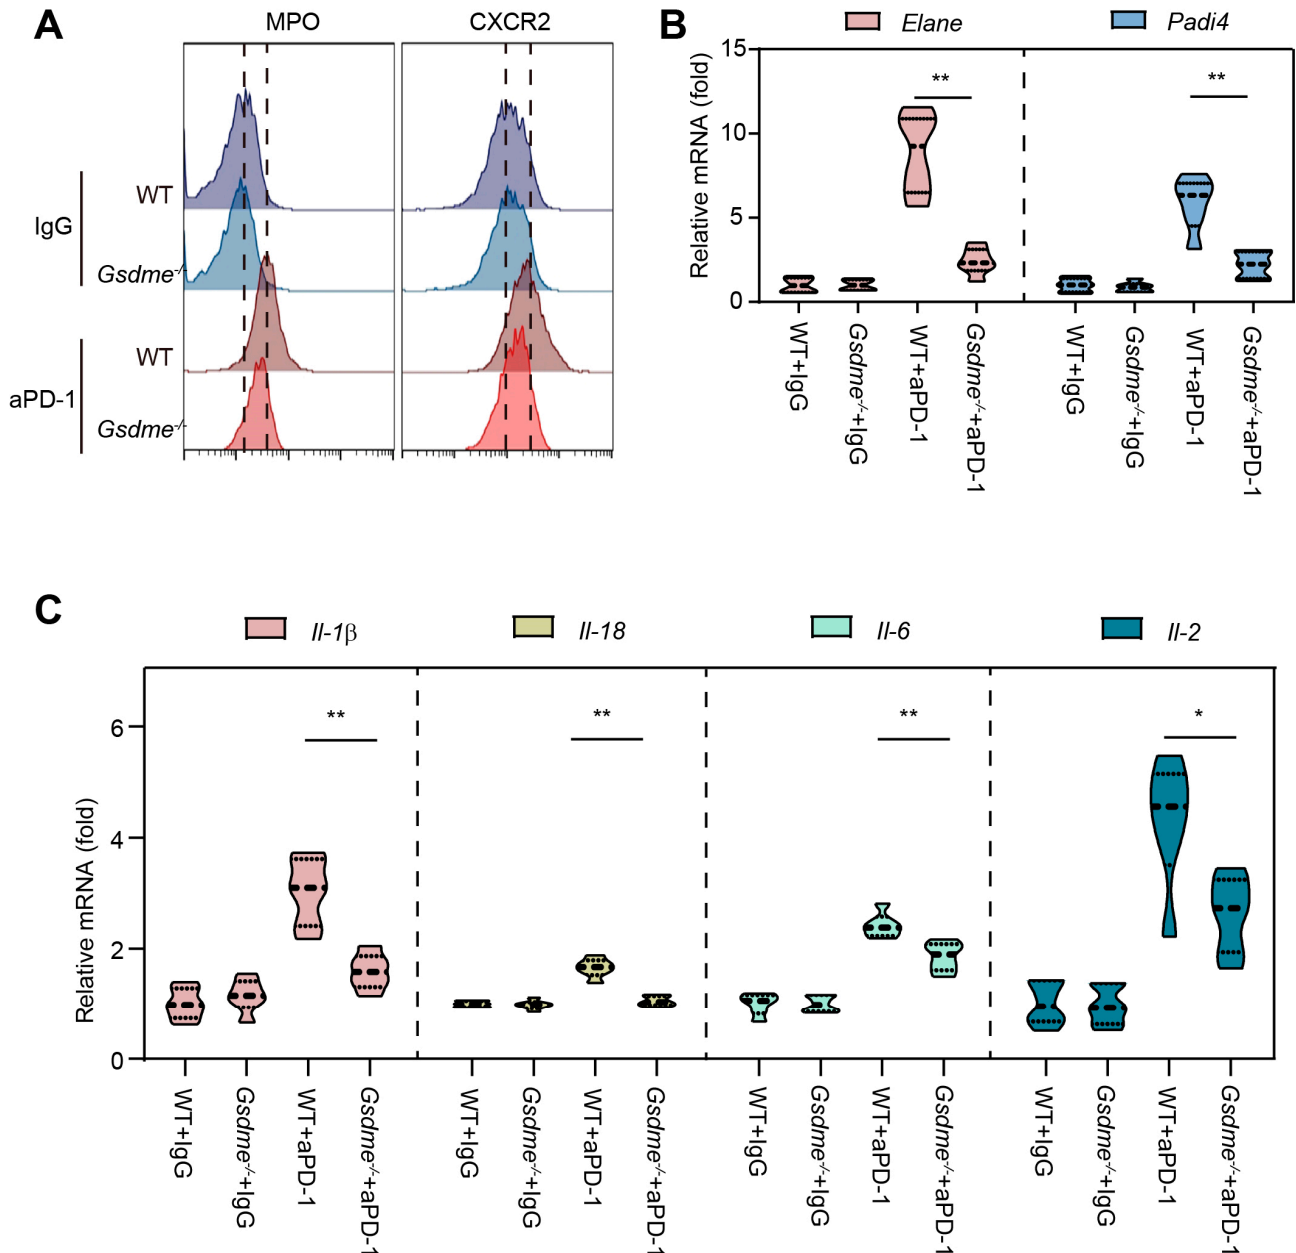

96  
97  
98  
99  
100  
101  
102  
103  
104  
105  
106  
107  
108  
109

### Deletion of GSDME alleviates aPD-1 therapy-induced myocardial inflammation

(A) Representative flow cytometry plots of MPO and CXCR2 in heart of WT and *Gsdme*<sup>-/-</sup> mice received aPD-1 therapy or normal IgG. MPO, myeloperoxidase; CXCR2, C-X-C motif chemokine receptor 2.

(B) Quantitative PCR analyses of mRNA levels of *Elane* and *Padi4* in heart of WT and *Gsdme*<sup>-/-</sup> mice received aPD-1 therapy or normal IgG. *Elane*, neutrophil elastase; *Padi4*, peptidyl arginine deiminase, type IV.

(C) Quantitative PCR analyses of mRNA levels of *IL-1β*, *IL-6*, *IL-18* and *IL-2* in heart of WT and *Gsdme*<sup>-/-</sup> mice received aPD-1 therapy or normal IgG. *IL-1β*, interleukin-1β; *IL-6*, interleukin-6; *IL-18*, interleukin-18; *IL-2*, interleukin-2.

The data were presented as means ± SEM and analyzed by two-sided unpaired Student's t-tests. \**P*<0.05, \*\**P*<0.01. *n* = 6 biologically independent experiments.

110 **Supplemental Fig 8**

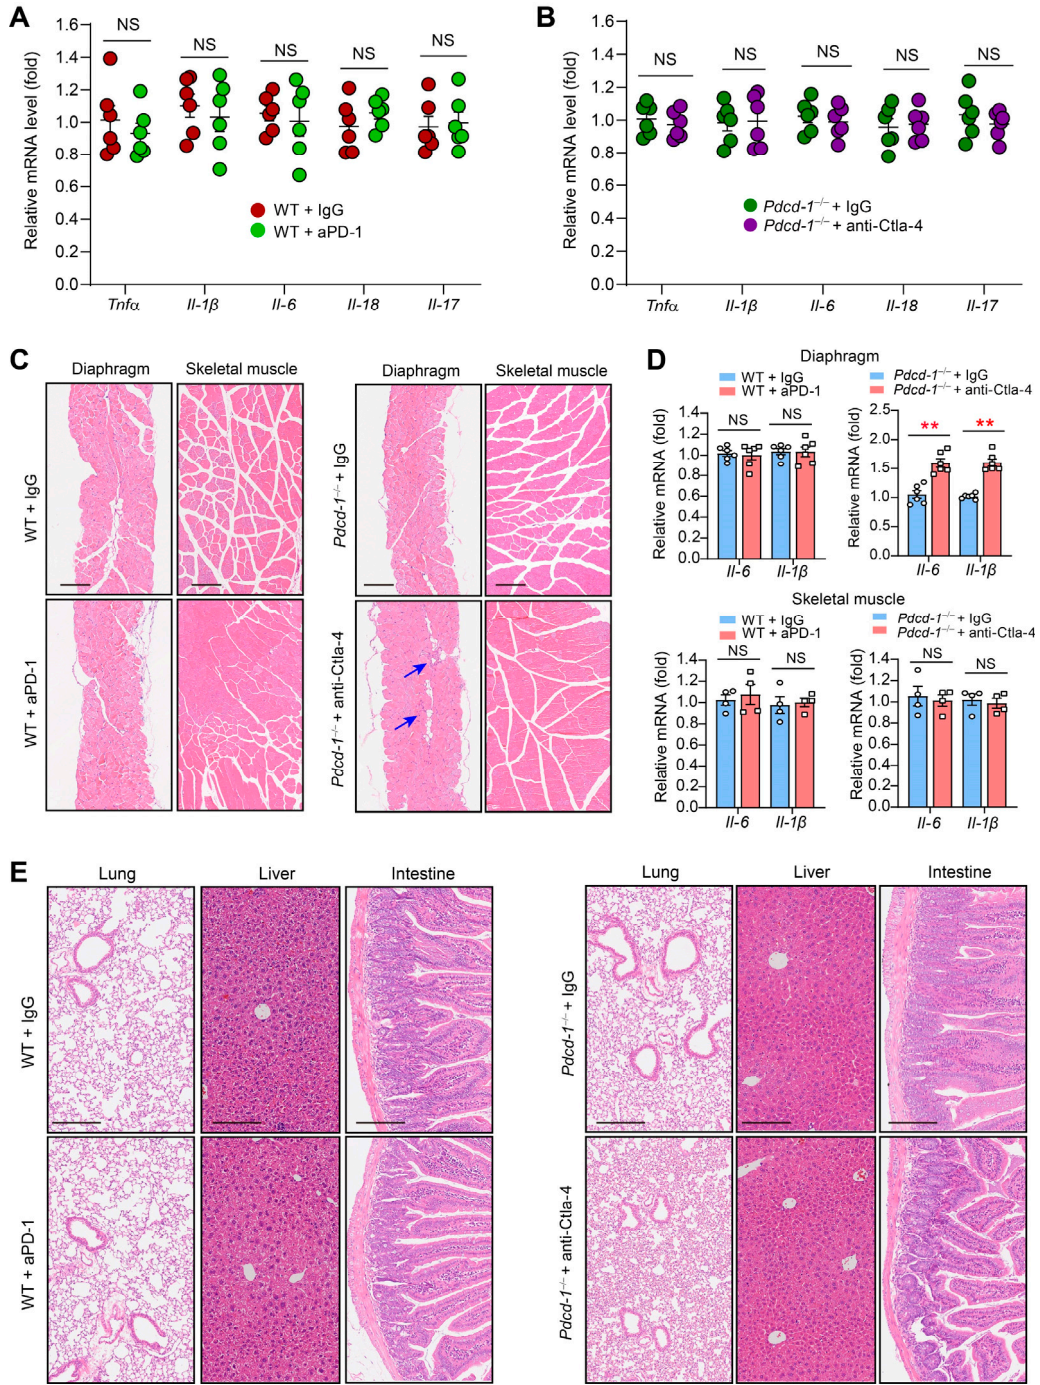

111  
 112 **Absence of systemic immune activation in two animal models of ICI-induced myocarditis.**  
 113 (A) The mRNA expression of *Tnfα*, *Il-1β*, *Il-6*, *Il-18* and *Il-17* in PBMCs isolated from WT mice  
 114 receiving IgG or anti-PD1. *n* = 6 biologically independent experiments.  
 115 (B) The mRNA expression of *Tnfα*, *Il-1β*, *Il-6*, *Il-18* and *Il-17* in PBMCs isolated from *Pdccl1*<sup>-/-</sup> mice  
 116 receiving IgG or anti-Ctla4. *n* = 6 biologically independent experiments.  
 117 (C) Histological analysis showing the structure of diaphragm and skeletal muscle (quadriceps  
 118 femoris muscle) of WT mice receiving IgG or anti-PD1, as well as *Pdccl1*<sup>-/-</sup> mice receiving IgG or  
 119 anti-Ctla4. Blue arrows indicate mild immune cell infiltration. *n* = 6 biologically independent  
 120 experiments.  
 121 (D) Quantitative analysis by qPCR on the *Il-6* and *Il-1β* in diaphragm (*n* = 6 biologically independent  
 122 experiments.) and skeletal muscle (*n* = 4 biologically independent experiments.) of WT mice  
 123 receiving IgG or anti-PD1, as well as *Pdccl1*<sup>-/-</sup> mice receiving IgG or anti-Ctla4.

124 (E) Histological analysis showing the structure of lung, liver and intestine of WT mice receiving IgG  
125 or anti-PD1, as well as *Pdcd1*<sup>-/-</sup> mice receiving IgG or anti-Ctla4. *n* = 6 biologically independent  
126 experiments.  
127 The data were presented as means ± SEM and analyzed by two-sided unpaired Student's t-tests.  
128 \**P*<0.05, \*\**P*<0.01. NS, no significance.  
129

130  
131

## Supplemental Figure 9

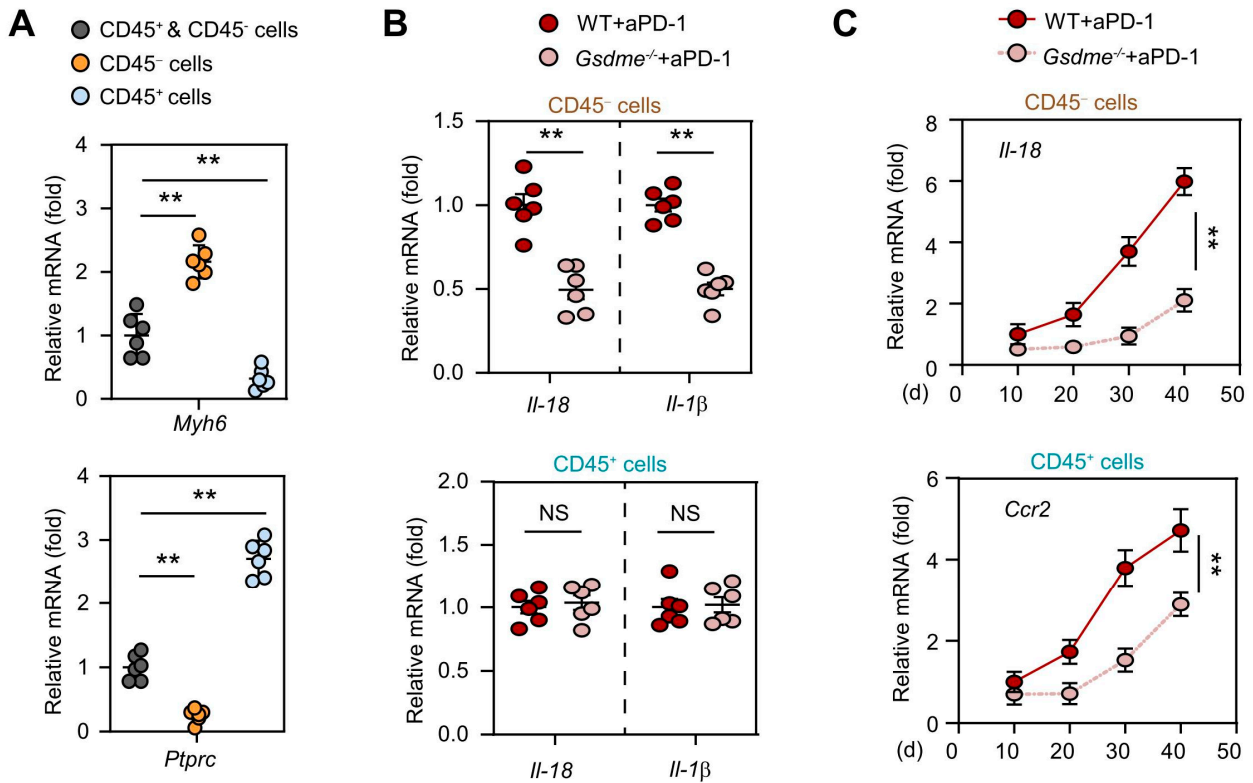

132

133

134

135

136

137

138

139

140

141

142

143

144

### Characterization of pyroptosis-related molecules in CD45<sup>+</sup> and CD45<sup>-</sup> cells isolated from hearts of WT and *Gsdme*<sup>-/-</sup> mice received aPD-1 therapy.

(A) Determination of signature genes *Myh6* (encoding cardiac  $\alpha$ -myosin heavy chain) and *Ptprc* (encoding CD45) expression in CD45<sup>+</sup> and CD45<sup>-</sup> cells isolated from hearts of WT and *Gsdme*<sup>-/-</sup> mice received aPD-1 therapy. CD45<sup>+</sup> and CD45<sup>-</sup> cells were isolated using sorting flow cytometry.

(B) Comparison of pyroptosis-related molecules *Il-18* and *Il-1β* expression in isolated CD45<sup>-</sup> and CD45<sup>+</sup> cells respectively between hearts of WT and *Gsdme*<sup>-/-</sup> mice received aPD-1 therapy.

(C) Comparison of *Il-18* and *Ccr2* mRNA expression in isolated CD45<sup>-</sup> and CD45<sup>+</sup> cells respectively between hearts of WT and *Gsdme*<sup>-/-</sup> mice received aPD-1 therapy.

The data were presented as means  $\pm$  SEM and analyzed by two-sided unpaired Student's t-tests. \*\* $P < 0.01$ . NS, no significance.  $n = 6$  biologically independent experiments.

145  
146

## Supplemental Figure 10

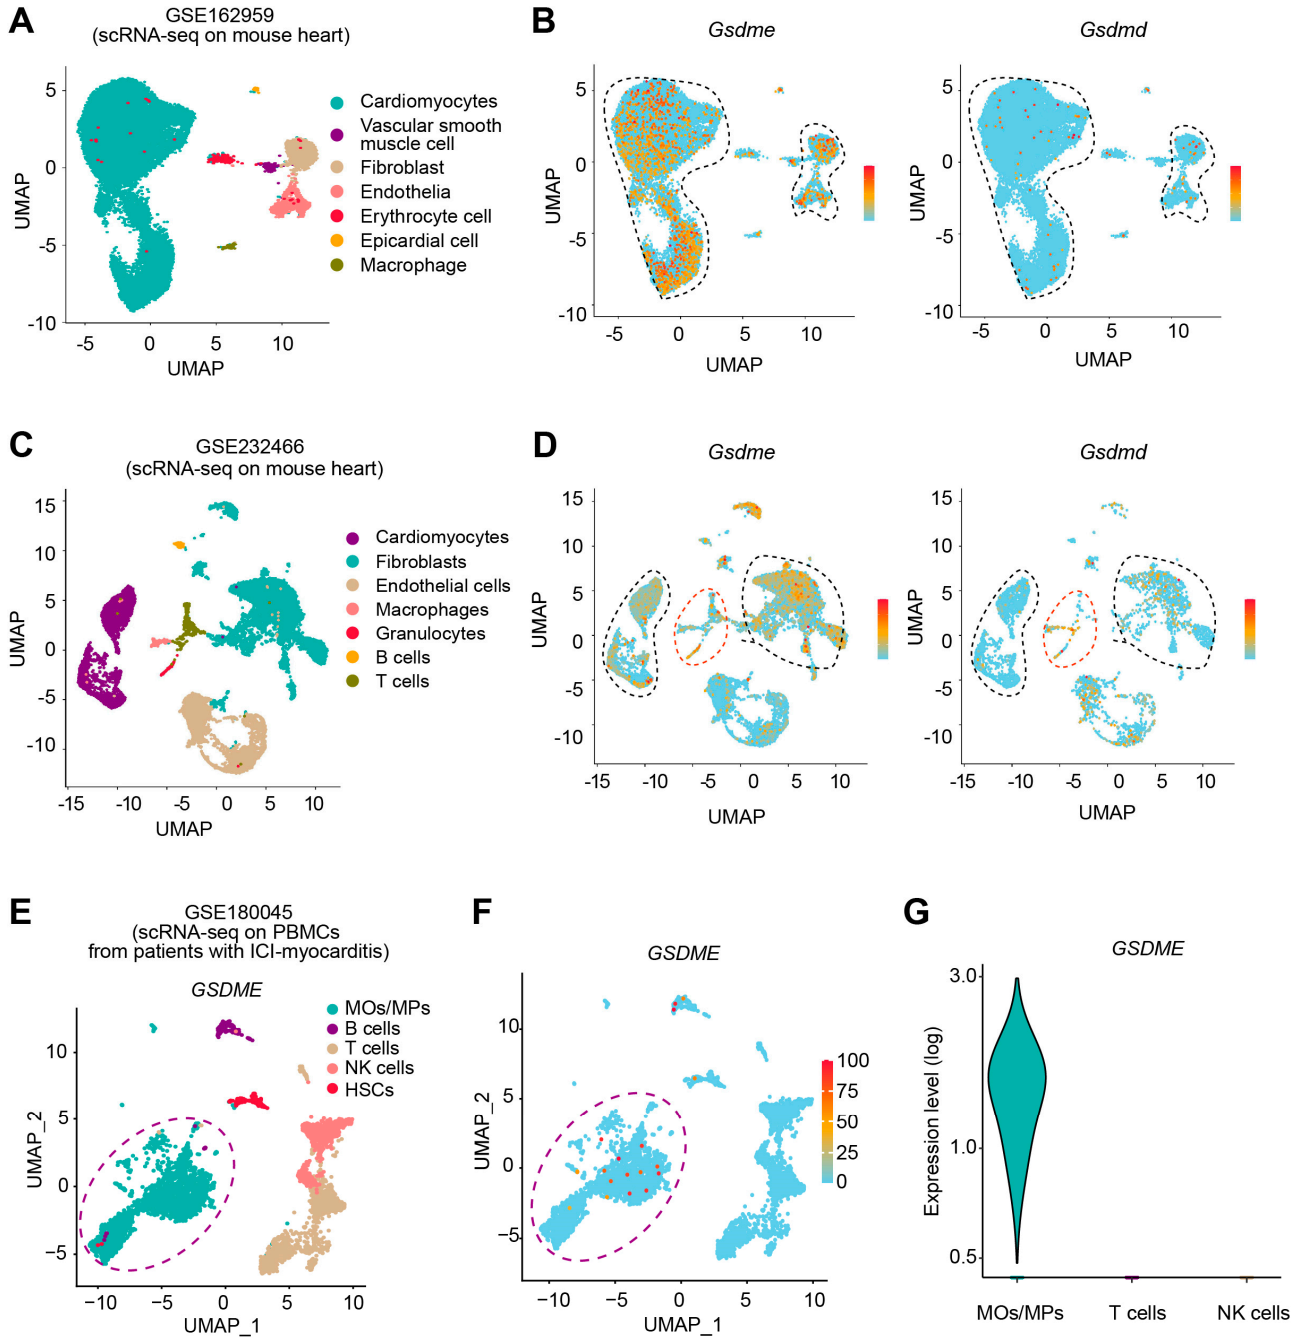

147  
148

**Public single-cell RNA sequencing (scRNA-seq) analysis of *Gsdme* transcription level in normal mouse heart and peripheral blood mononuclear cells (PBMCs) of patients with ICI-myocarditis.**

152 (A) UMAP analysis of cells clusters in mouse heart from a public scRNA-seq dataset (GEO Access  
153 Numbers: GSE162959).

154 (B) Transcription levels of *Gsdme* and *Gsdmd* in different clusters of cardiac cells. The colors in the  
155 expression-level heatmaps (right panel) represent the median intensity values for *Gsdme* or *Gsdmd*  
156 gene.

157 (C) UMAP analysis of cells clusters in mouse heart from a public scRNA-seq dataset (GEO Access  
158 Numbers: GSE232466).

159 (D) Transcription levels of *Gsdme* and *Gsdmd* in different clusters of cardiac cells. The colors in the  
160 expression-level heatmaps (right panel) represent the median intensity values for *Gsdme* or *Gsdmd*  
161 gene.  
162 (E) UMAP analysis of cells clusters in PBMCs of patients with ICI-myocarditis from a public scRNA-  
163 seq dataset (GEO Access Numbers: GSE180045).  
164 (F) Transcription levels of *Gsdme* in different clusters of immune cells within PBMCs. The colors in  
165 the expression-level heatmaps (right panel) represent the median intensity values for *Gsdme* gene.  
166 (G) Violin plot showing the transcription levels of *Gsdme* in MOs/MPs, T cells and NK cells.  
167  
168

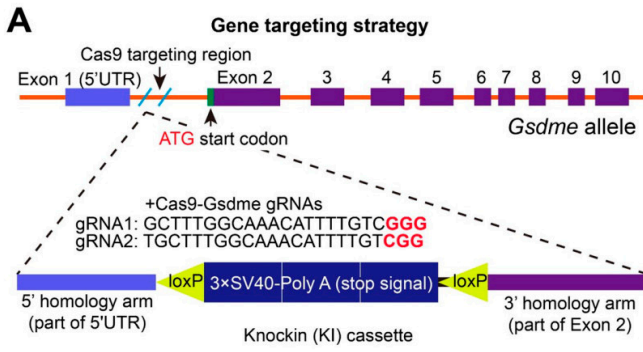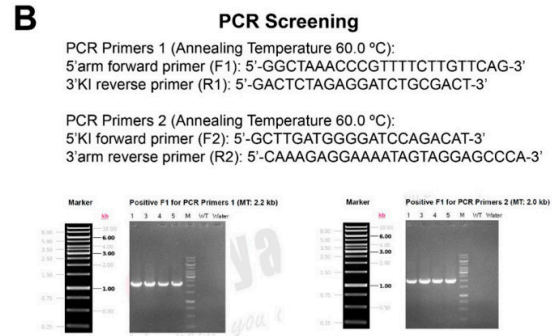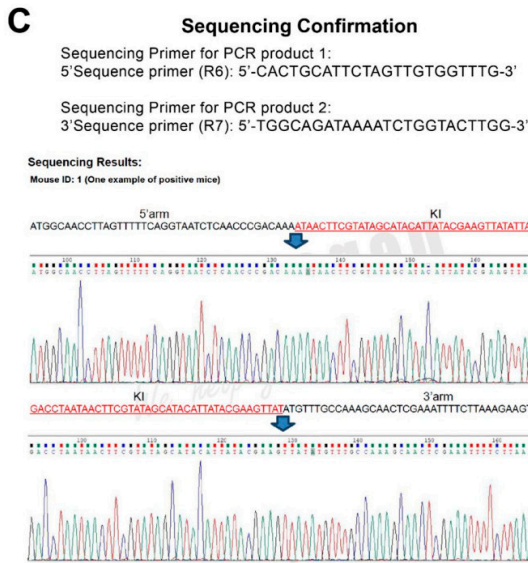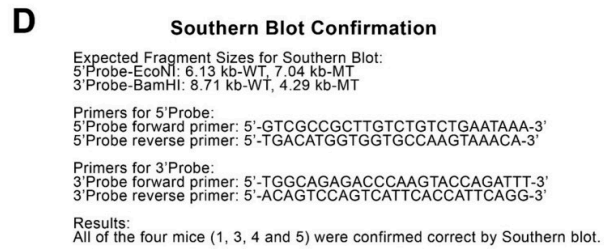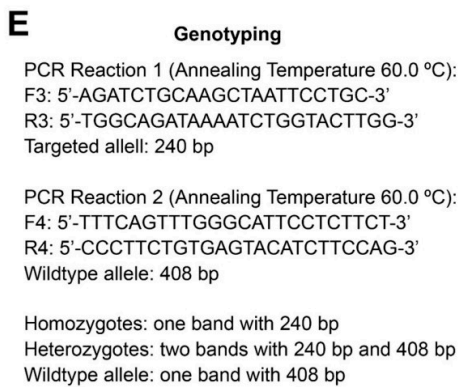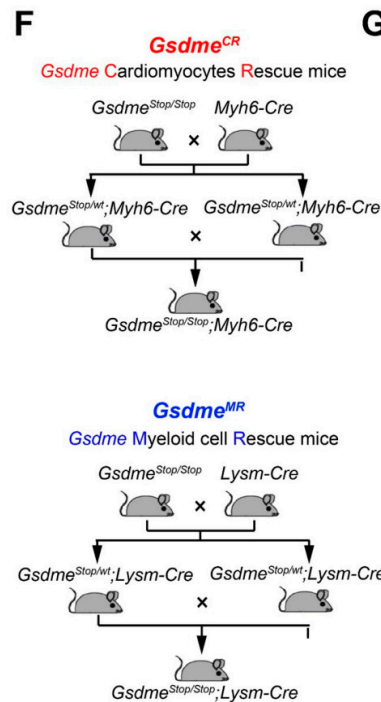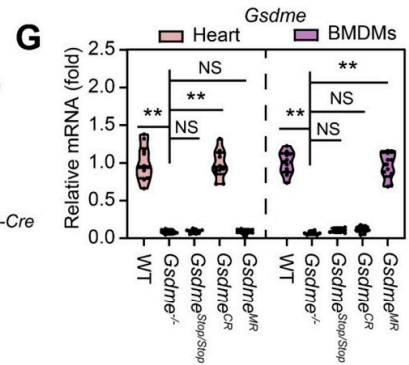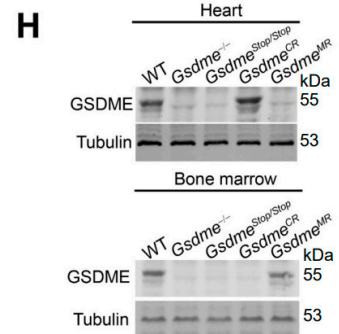



172 **Generation of mouse strains with conditional rescue of GSDME in cardiomyocytes and**  
173 **myeloid cells respectively**

174 (A) Schematic diagram showing the gene targeting strategy for generation a mouse strain carrying  
175 a transcriptional *Stop* element flanked by *loxP* recombination sites (*loxP-Stop-loxP*, LSL) upstream  
176 of the ATG start codon of *Gsdme* gene. The gRNA1 and gRNA2 to mouse *Gsdme* gene, the donor  
177 vector containing "part of 5'UTR-*loxP*-3\*SV40-Poly A -*loxP*-part of E2" cassette, and *Cas9* mRNA  
178 were co-injected into fertilized mouse eggs to generate targeted conditional knockin offspring  
179 (*Gsdme*<sup>Stop/Stop</sup>). The sequences of gRNA1 and gRNA2 were also shown. The *Stop* element before  
180 ATG start codon was expected to terminate the transcription of *Gsdme* gene.

181 (B) The PCR primers and array to identify the positive F1 *Gsdme*<sup>Stop/Stop</sup> mice. Four positive F1  
182 *Gsdme*<sup>Stop/Stop</sup> mice were identified.

183 (C) One of the positive F1 mice was sequenced to confirm the knockin targeting.

184 (D) Southern blot analysis further confirmed the successful knockin targeting.

185 (E) Genotyping of *Gsdme*<sup>Stop/Stop</sup> mice.

186 (F) The *Gsdme*<sup>Stop/Stop</sup> mouse strain was crossed with *Myh6*-Cre or *Lysm*-Cre mouse to produce  
187 *Gsdme*<sup>Stop/Stop</sup>;*Myh6*-Cre mouse (cardiomyocyte rescue of GSDME, referred as *Gsdme*<sup>CR</sup>) or  
188 *Gsdme*<sup>Stop/Stop</sup>;*Lysm*-Cre mouse (myeloid cell rescue of GSDME, referred as *Gsdme*<sup>MR</sup>). The Cre  
189 expression in cardiomyocyte or myeloid cell can delete the *Stop* element in specific tissue to allow  
190 GSDME re-expression.

191 (G) Quantitative PCR analysis showing *Gsdme* mRNA level in heart tissue and bone-marrow derived  
192 macrophages (BMDMs) from WT, *Gsdme*<sup>-/-</sup>, *Gsdme*<sup>Stop/Stop</sup>, *Gsdme*<sup>CR</sup> and *Gsdme*<sup>MR</sup> mice. *n* = 10  
193 biologically independent experiments. The data were presented as means ± SEM and analyzed by  
194 two-sided unpaired Student's t-tests. \*\**P*<0.01. NS, no significance.

195 (H) Immunoblotting analysis of GSDME protein level in heart tissue and bone marrow from WT,  
196 *Gsdme*<sup>-/-</sup>, *Gsdme*<sup>Stop/Stop</sup>, *Gsdme*<sup>CR</sup> and *Gsdme*<sup>MR</sup> mice. GSDME protein was rescued in heart of  
197 *Gsdme*<sup>CR</sup> mice and bone marrow of *Gsdme*<sup>MR</sup> mice. *n* = 6 biologically independent experiments.

198  
199

## Supplemental Figure 12

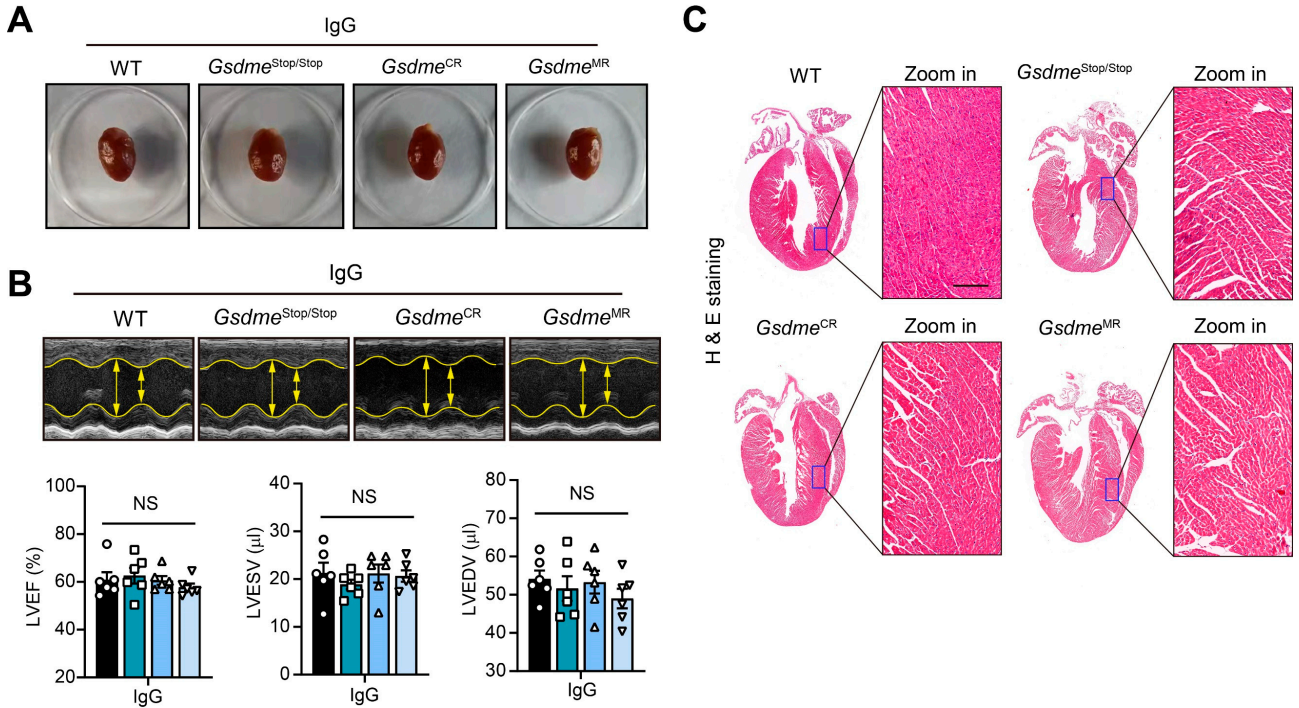

200

### 201 **Comparison of cardiac function of WT, *Gsdme*<sup>Stop/Stop</sup>, *Gsdme*<sup>CR</sup> and *Gsdme*<sup>MR</sup> mice under** 202 **normal condition**

203 (A) Morphology of hearts of WT, *Gsdme*<sup>Stop/Stop</sup>, *Gsdme*<sup>CR</sup> and *Gsdme*<sup>MR</sup> mice received control IgG.  
204 *n* = 6 biologically independent experiments.

205 (B) Representative echocardiograms in WT, *Gsdme*<sup>Stop/Stop</sup>, *Gsdme*<sup>CR</sup> and *Gsdme*<sup>MR</sup> mice received  
206 control IgG. *n* = 6 biologically independent experiments.

207 (C) HE staining of hearts of WT, *Gsdme*<sup>Stop/Stop</sup>, *Gsdme*<sup>CR</sup> and *Gsdme*<sup>MR</sup> mice received control IgG.  
208 *n* = 6 biologically independent experiments.

209 The data were presented as means ± SEM and analyzed by two-sided unpaired Student's t-tests.  
210 NS, no significance.

211

212  
213

### Supplemental Figure 13

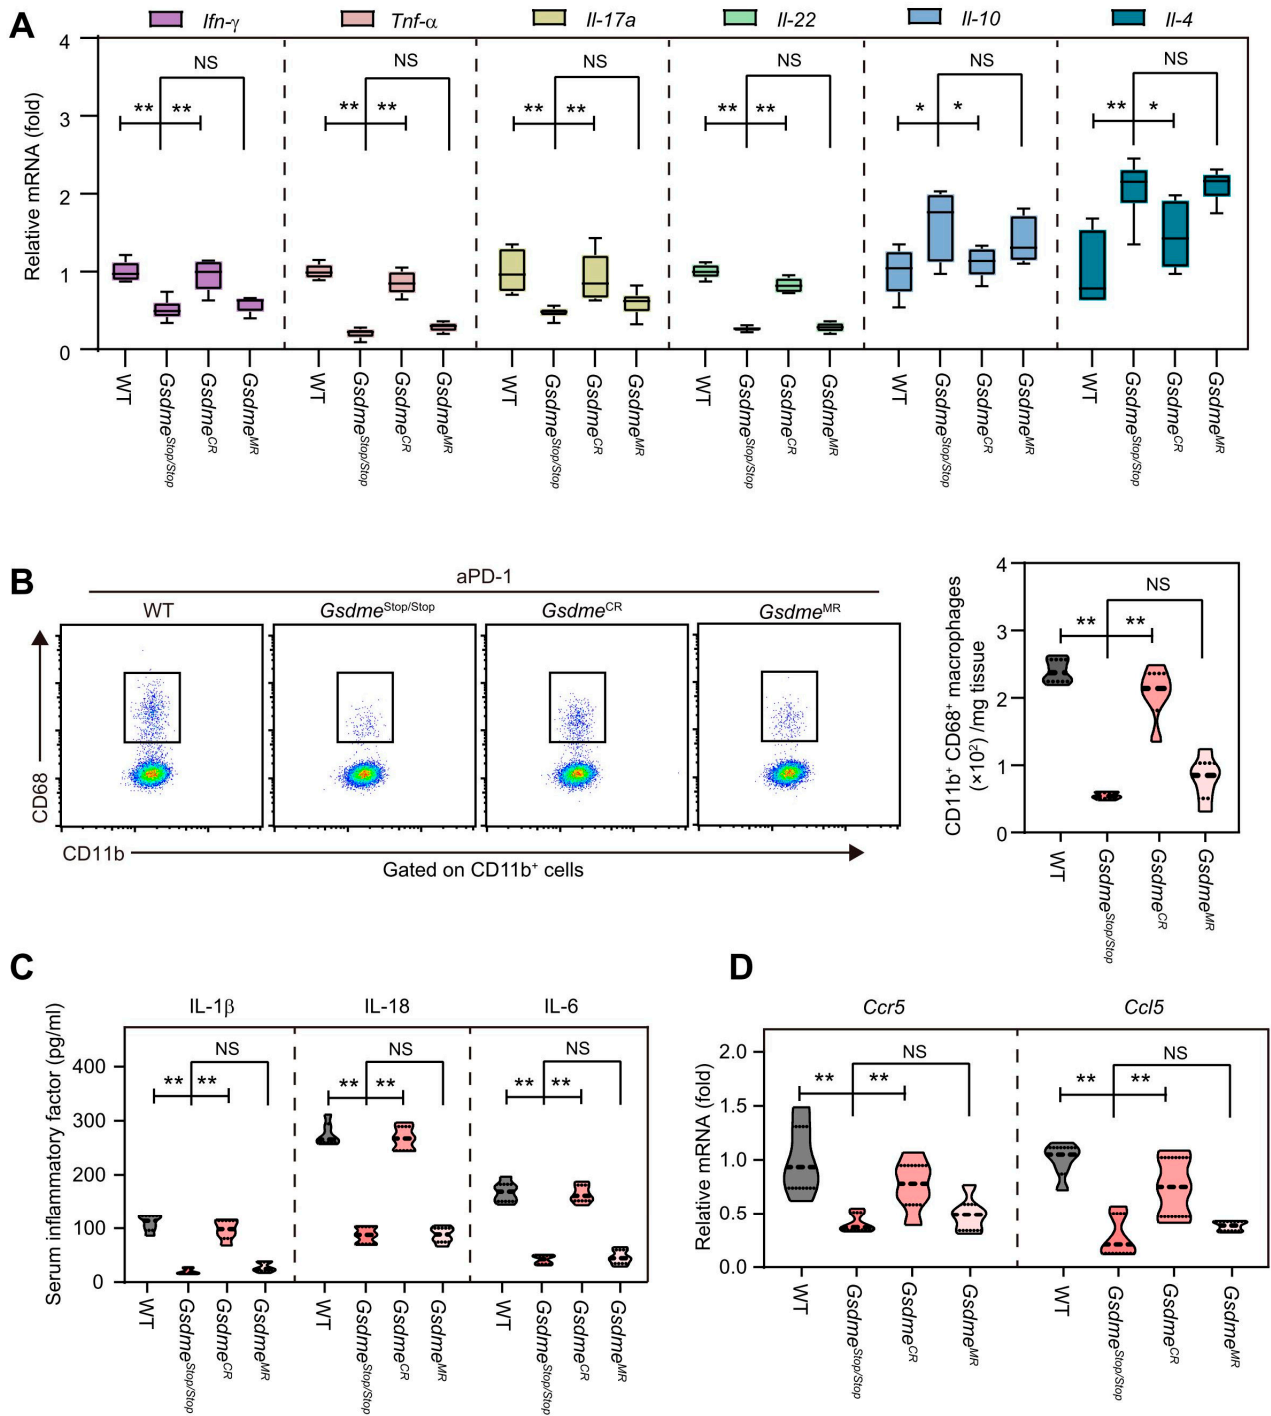

214  
215

### Rescue of GSDME in cardiomyocyte alleviates aPD-1 therapy-associated inflammation.

217 (A) Comparison of mRNA levels of *Ifn- $\gamma$* , *Tnf- $\alpha$* , *Il-17a*, *Il-22*, *Il-10* and *Il-4* in heart of WT, *Gsdme*<sup>Stop/Stop</sup>, *Gsdme*<sup>CR</sup> and *Gsdme*<sup>MR</sup> mice received aPD-1 therapy. *n* = 6 biologically independent experiments.

220 (B) Representative flow cytometry plots and quantitative analysis of CD11b<sup>+</sup>CD68<sup>+</sup> monocytes/macrophages (MOs/MPs) in heart of WT, *Gsdme*<sup>Stop/Stop</sup>, *Gsdme*<sup>CR</sup> and *Gsdme*<sup>MR</sup> mice received aPD-1 therapy. *n* = 6 biologically independent experiments.

223 (C) ELISA analyses showing the protein levels of pro-inflammatory factors including IL-1 $\beta$ , IL-18 and IL-6 in heart of WT, *Gsdme*<sup>Stop/Stop</sup>, *Gsdme*<sup>CR</sup> and *Gsdme*<sup>MR</sup> mice received aPD-1 therapy. *n* = 6

225 biologically independent experiments.

226 **(D)** Quantitative PCR analysis showing the mRNA levels of *Ccr5* and *Ccl5* in heart of WT,  
227 *Gsdme*<sup>Stop/Stop</sup>, *Gsdme*<sup>CR</sup> and *Gsdme*<sup>MR</sup> mice received aPD-1 therapy. *n* = 6 biologically independent  
228 experiments.

229 The data were presented as means ± SEM and analyzed by two-sided unpaired Student's t-tests.

230 \**P*<0.05, \*\**P*<0.01. NS, no significance.

231

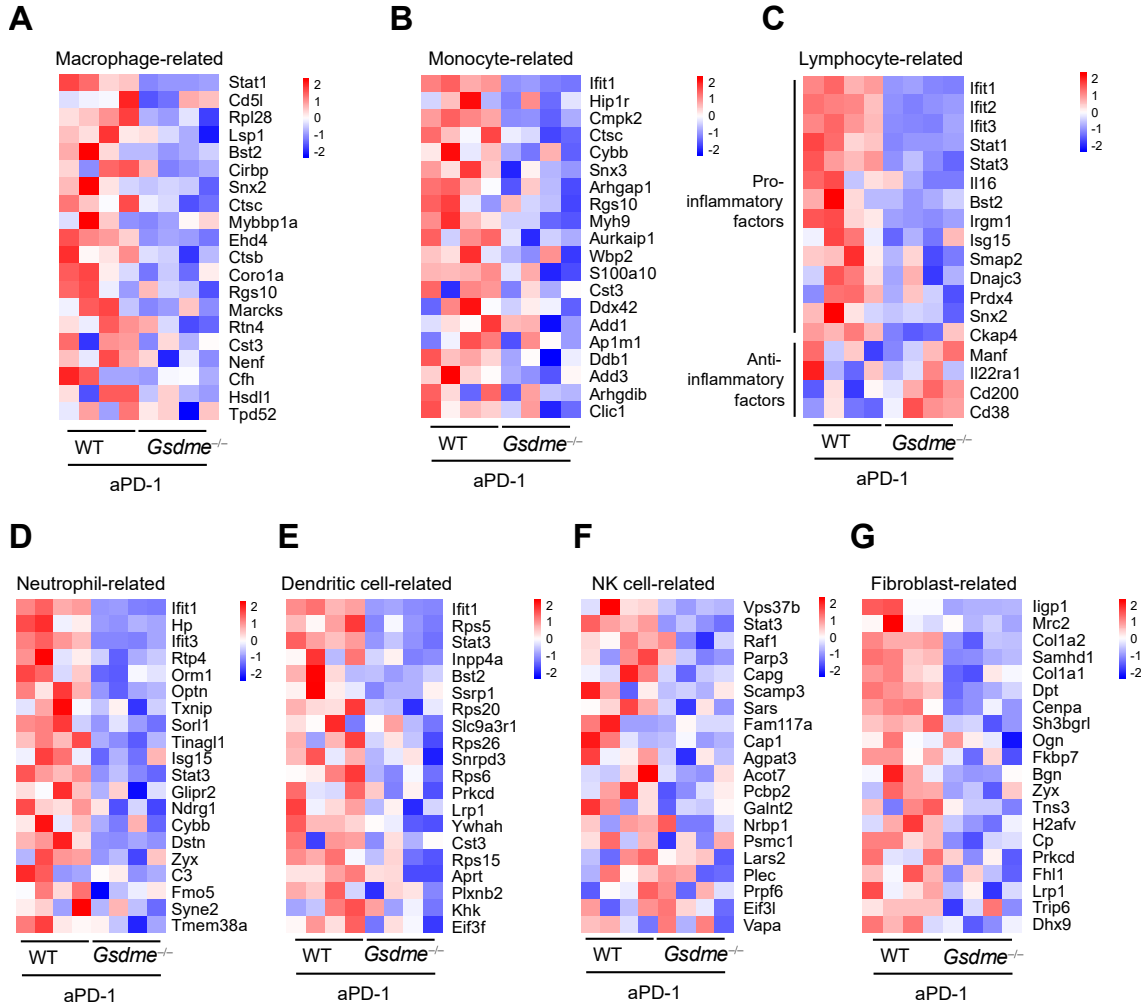

233

234 **Tandem Mass Tagging (TMT)-based multiplexed quantitative proteomics showing the**  
 235 **changed protein signatures in immune cells and fibroblasts between WT and *Gsdme*<sup>-/-</sup> mice**  
 236 **upon aPD-1 therapy**

237 (A) Macrophage-related protein signature between heart of WT and *Gsdme*<sup>-/-</sup> mice upon aPD-1  
 238 therapy.

239 (B) Monocyte-related protein signature between heart of WT and *Gsdme*<sup>-/-</sup> mice upon aPD-1  
 240 therapy.

241 (C) Lymphocyte-related protein signature between heart of WT and *Gsdme*<sup>-/-</sup> mice upon aPD-1  
 242 therapy.

243 (D) Neutrophil-related protein signature between heart of WT and *Gsdme*<sup>-/-</sup> mice upon aPD-1  
 244 therapy.

245 (E) Dendritic cell-related protein signature between heart of WT and *Gsdme*<sup>-/-</sup> mice upon aPD-1  
 246 therapy.

247 (F) NK cell-related protein signature between heart of WT and *Gsdme*<sup>-/-</sup> mice upon aPD-1 therapy.

248 (G) Fibroblast-related protein signature between heart of WT and *Gsdme*<sup>-/-</sup> mice upon aPD-1  
 249 therapy.

250

251 **Supplemental Figure 15**

252

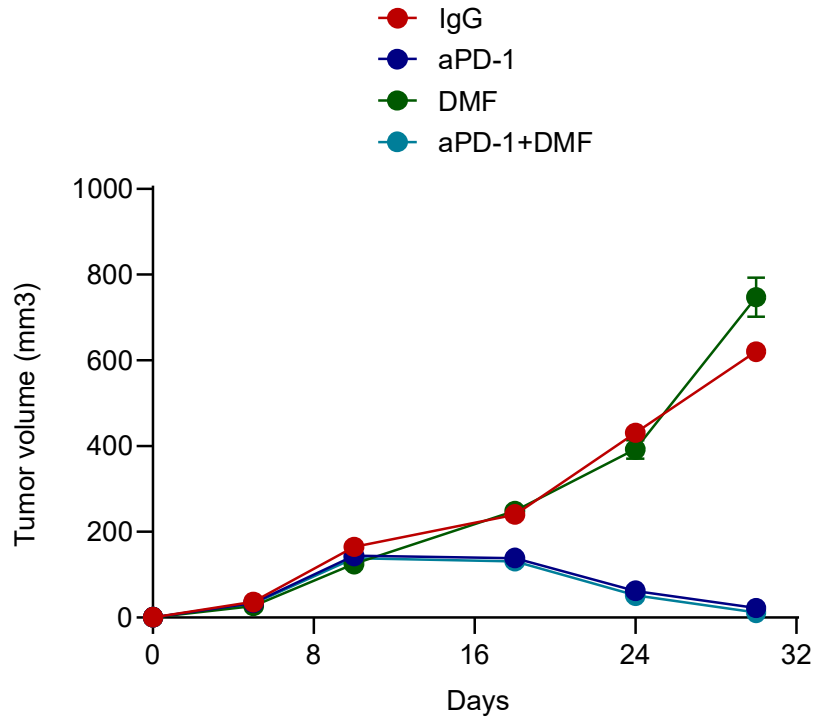

253

254

255 ***Effects of dimethyl fumarate (DMF) on tumor growth in the presence or absence of aPD-1***  
256 ***therapy.*** The Tumor size in tumor-bearing mice received overdose aPD-1 therapy or normal IgG or  
257 DMF or aPD-1+DMF. *n* = 6 biologically independent experiments.

## Supplemental Table 1

**Characteristics of 6 tumor patients with myocarditis after first-course therapy of aPD-1**

| Case No. | Gender | Tumor type        | Age | cTnT baseline (pg/ml) | cTnT elevation (>200 pg/ml) | cTnI baseline (pg/ml) | cTnI elevation (>200 pg/ml) | Major Criterion | Minor Criterion |                   |                             |                        | IC-OS 2021 criteria |
|----------|--------|-------------------|-----|-----------------------|-----------------------------|-----------------------|-----------------------------|-----------------|-----------------|-------------------|-----------------------------|------------------------|---------------------|
|          |        |                   |     |                       |                             |                       |                             | Diagnostic CMR  | Suggestive CMR  | Clinical syndrome | Decline in cardiac function | Ventricular arrhythmia |                     |
| 1        | M      | NSCLC             | 64  | <10                   | +                           | <10                   | +                           | +               | /               | +                 | +                           | +                      | Y                   |
| 2        | F      | NSCLC             | 68  | <10                   | +                           | <10                   | +                           | +               | /               | +                 | +                           | +                      | Y                   |
| 3        | M      | Gastric cancer    | 56  | <10                   | +                           | <10                   | +                           | -               | -               | +                 | +                           | -                      | Y                   |
| 4        | M      | Gastric cancer    | 59  | <10                   | +                           | <10                   | +                           | -               | +               | +                 | -                           | +                      | Y                   |
| 5        | F      | Melanoma          | 47  | <10                   | +                           | <10                   | +                           | -               | -               | +                 | +                           | -                      | Y                   |
| 6        | M      | Esophageal cancer | 56  | <10                   | +                           | <10                   | +                           | -               | -               | +                 | -                           | +                      | Y                   |

**IC-OS 2021 criteria:** troponin elevation + 1 major criterion or troponin elevation + with 2 minor criteria after exclusion of acute coronary syndrome or acute infectious myocarditis based on clinical suspicion. NSCLC, non-small cell lung cancer.

Supplemental Table 2.

Differentially expressed proteins between WT mice (n = 4) and *Gsdme*<sup>-/-</sup> mice upon aPD-1 therapy in isobaric Tandem Mass Tag multiplexed quantitative proteomics

| Protein accession | Protein name | MW [kDa] | Coverage [%] | Peptides | PSMs | Unique peptides | WT +aPD-1 | WT +aPD-1 | WT +aPD-1 | WT +aPD-1 | <i>Gsdme</i> <sup>-/-</sup> +aPD-1 to WT+aPD-1 ratio | P value   |
|-------------------|--------------|----------|--------------|----------|------|-----------------|-----------|-----------|-----------|-----------|------------------------------------|------------------------------------|------------------------------------|------------------------------------|------------------------------------------------------|-----------|
| Q61941            | Nnt          | 113.84   | 34.8         | 37       | 117  | 37              | 1.677     | 1.645     | 1.637     | 1.617     | 0.253                              | 0.272                              | 0.221                              | 0.247                              | 0.151                                                | 1.726E-10 |
| Q80TD3            | Fnip2        | 122.52   | 0.7          | 1        | 1    | 1               | 2.247     | 2.299     | 0.880     | 1.043     | 0.286                              | 0.288                              | 0.369                              | 0.370                              | 0.203                                                | 1.479E-02 |
| Q64282            | Ifit1        | 53.74    | 19.7         | 7        | 10   | 7               | 1.554     | 1.701     | 1.368     | 1.451     | 0.488                              | 0.529                              | 0.401                              | 0.371                              | 0.295                                                | 1.126E-05 |
| Q60766            | Irgm1        | 46.55    | 21.0         | 9        | 13   | 9               | 1.649     | 1.681     | 1.166     | 1.085     | 0.625                              | 0.589                              | 0.536                              | 0.614                              | 0.424                                                | 2.243E-03 |
| Q9QZ85            | Iigp1        | 47.57    | 34.4         | 11       | 13   | 11              | 1.724     | 1.776     | 0.965     | 0.984     | 0.567                              | 0.623                              | 0.619                              | 0.638                              | 0.449                                                | 1.561E-02 |
| Q64112            | Ifit2        | 55.02    | 3.0          | 1        | 1    | 1               | 1.460     | 1.405     | 1.393     | 1.201     | 0.627                              | 0.574                              | 0.636                              | 0.663                              | 0.458                                                | 1.653E-05 |
| Q9R233            | Tapbp        | 49.74    | 7.1          | 3        | 3    | 3               | 1.566     | 1.590     | 1.150     | 1.131     | 0.572                              | 0.568                              | 0.692                              | 0.663                              | 0.459                                                | 1.327E-03 |
| Q61646            | Hp           | 38.75    | 34.6         | 12       | 16   | 12              | 1.618     | 1.721     | 0.951     | 1.047     | 0.630                              | 0.596                              | 0.701                              | 0.666                              | 0.486                                                | 1.310E-02 |
| P42225            | Stat1        | 87.20    | 20.7         | 13       | 20   | 13              | 1.517     | 1.410     | 1.105     | 1.158     | 0.627                              | 0.671                              | 0.670                              | 0.696                              | 0.513                                                | 7.332E-04 |
| Q8BGV8            | Mief1        | 51.18    | 5.8          | 2        | 2    | 2               | 1.296     | 1.321     | 1.369     | 1.243     | 0.621                              | 0.617                              | 0.781                              | 0.751                              | 0.530                                                | 1.820E-05 |
| Q64345            | Ifit3        | 47.22    | 7.2          | 3        | 3    | 3               | 1.282     | 1.351     | 1.236     | 1.154     | 0.722                              | 0.720                              | 0.707                              | 0.792                              | 0.586                                                | 2.705E-05 |
| P01887            | B2m          | 13.78    | 8.4          | 1        | 3    | 1               | 1.368     | 1.371     | 1.082     | 1.098     | 0.717                              | 0.751                              | 0.815                              | 0.755                              | 0.618                                                | 1.323E-03 |
| Q9ER80            | Rtp4         | 28.39    | 3.6          | 1        | 1    | 1               | 1.263     | 1.581     | 0.921     | 1.030     | 0.871                              | 0.616                              | 0.791                              | 0.861                              | 0.655                                                | 3.912E-02 |
| Q07797            | Lgals3bp     | 64.49    | 9.9          | 4        | 5    | 4               | 1.261     | 1.216     | 1.079     | 1.211     | 0.757                              | 0.817                              | 0.741                              | 0.830                              | 0.660                                                | 1.037E-04 |
| P01901            | H2-K1        | 41.30    | 26.0         | 8        | 11   | 5               | 1.382     | 1.367     | 0.987     | 1.038     | 0.744                              | 0.770                              | 0.852                              | 0.824                              | 0.668                                                | 1.046E-02 |
| P97371            | Psme1        | 28.67    | 57.4         | 13       | 25   | 13              | 1.338     | 1.250     | 1.043     | 1.121     | 0.807                              | 0.797                              | 0.804                              | 0.804                              | 0.676                                                | 1.098E-03 |
| Q03734            | Serpina3     | 47.06    | 16.0         | 6        | 14   | 2               | 1.220     | 1.185     | 1.163     | 1.214     | 0.726                              | 0.683                              | 0.903                              | 0.929                              | 0.678                                                | 8.960E-04 |
| O35955            | Psmb10       | 29.06    | 10.6         | 3        | 3    | 3               | 1.275     | 1.496     | 0.968     | 1.032     | 0.794                              | 0.731                              | 0.850                              | 0.883                              | 0.683                                                | 2.344E-02 |



|        |               |        |      |    |    |    |       |       |       |       |       |       |       |       |       |           |
|--------|---------------|--------|------|----|----|----|-------|-------|-------|-------|-------|-------|-------|-------|-------|-----------|
| P01899 | <b>H2-D1</b>  | 40.84  | 20.4 | 7  | 12 | 3  | 1.220 | 1.195 | 1.153 | 1.156 | 0.805 | 0.783 | 0.832 | 0.843 | 0.691 | 2.353E-06 |
| Q9QZU9 | <b>Ube2l6</b> | 17.84  | 9.8  | 1  | 1  | 1  | 1.215 | 1.209 | 1.047 | 1.172 | 0.864 | 0.997 | 0.746 | 0.663 | 0.704 | 5.945E-03 |
| P36371 | <b>Tap2</b>   | 77.44  | 8.0  | 5  | 5  | 5  | 1.323 | 1.267 | 1.081 | 1.072 | 0.733 | 0.782 | 0.858 | 0.972 | 0.705 | 5.490E-03 |
| Q8CAS9 | <b>Parp9</b>  | 96.66  | 2.4  | 2  | 3  | 2  | 1.187 | 1.248 | 0.965 | 1.238 | 0.821 | 0.803 | 0.757 | 0.939 | 0.716 | 5.116E-03 |
| Q99L88 | <b>Sntb1</b>  | 58.08  | 4.1  | 2  | 2  | 2  | 0.998 | 1.122 | 1.264 | 1.238 | 0.827 | 0.839 | 0.845 | 0.869 | 0.731 | 2.344E-03 |
| Q01149 | <b>Col1a2</b> | 129.56 | 10.1 | 12 | 15 | 12 | 1.189 | 1.129 | 1.132 | 1.155 | 0.835 | 0.757 | 0.914 | 0.903 | 0.740 | 2.502E-04 |
| P21958 | <b>Tap1</b>   | 78.86  | 1.9  | 2  | 2  | 2  | 1.380 | 1.273 | 0.914 | 0.992 | 0.831 | 0.833 | 0.937 | 0.806 | 0.747 | 4.611E-02 |
| Q8BZ20 | <b>Parp12</b> | 79.92  | 2.0  | 1  | 1  | 1  | 1.139 | 1.150 | 1.255 | 1.022 | 0.853 | 0.926 | 0.671 | 0.971 | 0.749 | 1.260E-02 |
| Q80SU7 | <b>Gvin1</b>  | 280.81 | 5.9  | 14 | 14 | 14 | 1.168 | 1.235 | 1.137 | 1.117 | 0.768 | 0.813 | 0.964 | 0.947 | 0.750 | 1.848E-03 |
| P28063 | <b>Psmb8</b>  | 30.26  | 8.0  | 2  | 2  | 2  | 1.244 | 1.277 | 0.958 | 1.062 | 0.842 | 0.820 | 0.876 | 0.893 | 0.756 | 1.159E-02 |
| Q8VCK3 | <b>Tubg2</b>  | 51.12  | 4.4  | 2  | 2  | 2  | 1.018 | 1.128 | 1.177 | 1.199 | 0.934 | 0.951 | 0.765 | 0.784 | 0.759 | 5.105E-03 |
| P97372 | <b>Psme2</b>  | 27.06  | 28.9 | 6  | 9  | 6  | 1.168 | 1.201 | 1.047 | 1.090 | 0.824 | 0.824 | 0.886 | 0.933 | 0.769 | 1.063E-03 |
| Q60710 | <b>Samhd1</b> | 75.89  | 13.8 | 8  | 11 | 8  | 1.189 | 1.167 | 1.070 | 1.094 | 0.843 | 0.848 | 0.887 | 0.908 | 0.771 | 2.105E-04 |
| P63078 | <b>Gng8</b>   | 7.84   | 17.1 | 1  | 1  | 1  | 1.144 | 1.202 | 1.081 | 1.098 | 0.867 | 0.698 | 0.970 | 0.963 | 0.773 | 9.775E-03 |
| Q9CYZ8 | <b>Ssbp2</b>  | 37.85  | 3.6  | 1  | 1  | 1  | 1.135 | 0.997 | 1.076 | 1.273 | 0.858 | 0.946 | 0.799 | 0.897 | 0.781 | 9.907E-03 |
| Q60590 | <b>Orm1</b>   | 23.90  | 7.7  | 2  | 2  | 2  | 1.257 | 1.211 | 0.947 | 1.075 | 0.791 | 0.774 | 0.992 | 0.965 | 0.784 | 3.657E-02 |
| Q9ER38 | <b>Tor3a</b>  | 43.81  | 3.1  | 1  | 1  | 1  | 1.075 | 1.110 | 1.196 | 1.110 | 0.877 | 0.828 | 0.981 | 0.840 | 0.785 | 1.414E-03 |
| Q9Z0E6 | <b>Gbp2</b>   | 66.74  | 15.4 | 7  | 8  | 7  | 1.210 | 1.161 | 1.012 | 1.048 | 0.821 | 0.818 | 0.855 | 1.000 | 0.789 | 1.014E-02 |
| O70228 | <b>Atp9a</b>  | 118.61 | 1.1  | 1  | 1  | 1  | 1.084 | 1.121 | 1.123 | 1.150 | 0.864 | 0.827 | 0.983 | 0.858 | 0.789 | 6.791E-04 |
| Q99388 | <b>Csprs</b>  | 24.06  | 4.8  | 1  | 1  | 1  | 1.109 | 1.073 | 1.150 | 1.138 | 0.921 | 0.843 | 0.781 | 0.986 | 0.790 | 2.721E-03 |
| Q61555 | <b>Fbn2</b>   | 313.82 | 1.3  | 4  | 5  | 1  | 1.236 | 1.061 | 1.113 | 1.094 | 0.769 | 0.731 | 1.108 | 0.952 | 0.790 | 4.791E-02 |
| Q3UYH7 | <b>Adrbk2</b> | 79.66  | 1.7  | 1  | 1  | 1  | 1.047 | 1.167 | 1.173 | 1.067 | 0.890 | 0.903 | 0.894 | 0.849 | 0.794 | 6.033E-04 |
| P17918 | <b>Pcna</b>   | 28.79  | 17.2 | 3  | 3  | 3  | 1.026 | 1.306 | 1.011 | 1.082 | 0.878 | 0.894 | 0.823 | 0.942 | 0.799 | 2.227E-02 |
| Q8BVK9 | <b>Sp110</b>  | 50.14  | 2.0  | 1  | 1  | 1  | 1.226 | 0.874 | 1.254 | 1.102 | 0.918 | 0.875 | 0.909 | 0.876 | 0.803 | 4.557E-02 |
| Q3U5Q7 | <b>Cmpk2</b>  | 50.04  | 27.1 | 9  | 14 | 9  | 1.072 | 1.123 | 1.092 | 1.061 | 0.876 | 0.879 | 0.839 | 0.904 | 0.805 | 3.137E-05 |

|        |                |        |      |    |    |    |       |       |       |       |       |       |       |       |       |           |
|--------|----------------|--------|------|----|----|----|-------|-------|-------|-------|-------|-------|-------|-------|-------|-----------|
| P83882 | <b>Rpl36a</b>  | 12.44  | 17.0 | 2  | 2  | 2  | 1.050 | 1.134 | 1.210 | 1.031 | 0.824 | 1.034 | 0.737 | 0.966 | 0.805 | 3.379E-02 |
| Q61581 | <b>Igfbp7</b>  | 28.97  | 8.5  | 2  | 2  | 2  | 1.175 | 0.936 | 1.144 | 1.158 | 0.996 | 0.975 | 0.838 | 0.751 | 0.807 | 3.851E-02 |
| Q61704 | <b>Itih3</b>   | 99.36  | 2.1  | 2  | 2  | 2  | 1.255 | 1.078 | 1.049 | 1.045 | 0.900 | 0.864 | 0.894 | 0.914 | 0.807 | 5.773E-03 |
| Q9CPQ8 | <b>Atp5mg</b>  | 11.42  | 19.4 | 2  | 10 | 2  | 1.061 | 1.007 | 1.211 | 1.212 | 0.891 | 0.883 | 0.929 | 0.929 | 0.809 | 7.200E-03 |
| Q61233 | <b>Lcp1</b>    | 70.15  | 27.3 | 14 | 18 | 12 | 1.130 | 1.159 | 1.054 | 1.056 | 0.906 | 0.879 | 0.886 | 0.894 | 0.810 | 2.543E-04 |
| Q8K3K8 | <b>Optn</b>    | 67.02  | 3.4  | 2  | 6  | 2  | 1.128 | 1.030 | 1.194 | 1.079 | 0.901 | 0.850 | 0.915 | 0.928 | 0.811 | 1.712E-03 |
| Q9CY57 | <b>Chtop</b>   | 26.59  | 5.2  | 1  | 2  | 1  | 1.044 | 1.113 | 1.186 | 1.080 | 0.840 | 0.894 | 0.918 | 0.943 | 0.813 | 1.464E-03 |
| Q62351 | <b>Tfrc</b>    | 85.73  | 15.9 | 12 | 18 | 12 | 1.127 | 1.085 | 1.117 | 1.090 | 0.910 | 0.903 | 0.875 | 0.913 | 0.815 | 5.003E-06 |
| P11087 | <b>Col1a1</b>  | 138.03 | 9.2  | 12 | 18 | 12 | 1.133 | 1.162 | 1.062 | 1.034 | 0.798 | 0.768 | 1.030 | 0.984 | 0.815 | 3.069E-02 |
| Q8CD91 | <b>Smoc2</b>   | 49.89  | 2.5  | 1  | 1  | 1  | 1.064 | 0.973 | 1.218 | 1.163 | 0.867 | 0.908 | 0.858 | 0.974 | 0.816 | 1.517E-02 |
| Q9QZZ6 | <b>Dpt</b>     | 24.00  | 23.9 | 5  | 6  | 5  | 1.139 | 1.111 | 1.087 | 1.061 | 0.853 | 0.887 | 0.914 | 0.958 | 0.821 | 3.969E-04 |
| P32921 | <b>Wars</b>    | 54.36  | 21.4 | 8  | 13 | 8  | 1.123 | 1.137 | 1.066 | 1.097 | 0.851 | 0.834 | 1.009 | 0.945 | 0.823 | 4.300E-03 |
| Q9EQH2 | <b>Erap1</b>   | 106.60 | 13.8 | 13 | 17 | 13 | 1.081 | 1.105 | 1.049 | 1.091 | 0.917 | 0.918 | 0.850 | 0.884 | 0.825 | 8.060E-05 |
| O88307 | <b>Sort1</b>   | 247.08 | 1.0  | 2  | 2  | 2  | 1.113 | 1.122 | 1.190 | 0.951 | 0.893 | 0.970 | 0.898 | 0.861 | 0.828 | 1.473E-02 |
| P55821 | <b>Stmn2</b>   | 20.83  | 10.6 | 2  | 2  | 1  | 1.089 | 1.181 | 1.064 | 1.027 | 1.029 | 0.829 | 0.864 | 0.894 | 0.829 | 1.438E-02 |
| Q9D6N5 | <b>Drap1</b>   | 22.28  | 3.9  | 1  | 1  | 1  | 1.011 | 0.875 | 0.834 | 0.902 | 1.100 | 1.160 | 1.057 | 1.077 | 1.213 | 4.599E-03 |
| Q02013 | <b>Aqp1</b>    | 28.79  | 14.5 | 3  | 7  | 3  | 0.915 | 0.882 | 0.911 | 0.902 | 1.120 | 1.126 | 1.089 | 1.047 | 1.214 | 6.185E-05 |
| Q8CBE3 | <b>Wdr37</b>   | 55.05  | 10.9 | 5  | 6  | 5  | 1.030 | 0.913 | 0.787 | 0.868 | 1.123 | 0.990 | 1.199 | 1.058 | 1.215 | 2.898E-02 |
| B1AUE5 | <b>Pex10</b>   | 37.16  | 6.8  | 2  | 2  | 2  | 0.882 | 0.853 | 0.934 | 0.965 | 1.178 | 0.986 | 1.108 | 1.146 | 1.216 | 7.114E-03 |
| O88456 | <b>Capns1</b>  | 28.46  | 8.9  | 3  | 3  | 3  | 0.882 | 0.956 | 0.914 | 0.872 | 1.068 | 1.104 | 1.178 | 1.067 | 1.219 | 8.411E-04 |
| Q99M07 | <b>Coa5</b>    | 8.36   | 20.3 | 1  | 1  | 1  | 0.984 | 0.727 | 0.888 | 1.010 | 1.205 | 1.157 | 0.997 | 1.044 | 1.220 | 4.817E-02 |
| Q8C0Z1 | <b>Fam234a</b> | 60.58  | 3.4  | 2  | 2  | 2  | 0.907 | 0.904 | 0.890 | 0.914 | 1.228 | 1.011 | 1.126 | 1.049 | 1.221 | 6.030E-03 |
| P50543 | <b>S100a11</b> | 11.08  | 20.4 | 2  | 3  | 2  | 0.923 | 0.942 | 0.843 | 0.888 | 1.177 | 1.187 | 0.984 | 1.043 | 1.221 | 1.089E-02 |
| P09528 | <b>Fth1</b>    | 21.07  | 45.6 | 6  | 18 | 6  | 0.977 | 0.858 | 0.873 | 0.902 | 1.079 | 1.024 | 1.149 | 1.165 | 1.224 | 2.991E-03 |
| Q9CQF4 | <b>Mtres1</b>  | 27.85  | 12.1 | 3  | 5  | 3  | 0.873 | 0.926 | 0.915 | 0.923 | 1.025 | 1.172 | 1.100 | 1.165 | 1.227 | 1.298E-03 |

|        |                 |        |      |   |    |   |       |       |       |       |       |       |       |       |       |           |
|--------|-----------------|--------|------|---|----|---|-------|-------|-------|-------|-------|-------|-------|-------|-------|-----------|
| P15864 | <b>H1-2</b>     | 21.27  | 33.0 | 8 | 14 | 2 | 0.852 | 0.811 | 0.972 | 0.956 | 1.205 | 1.206 | 0.973 | 1.028 | 1.229 | 2.903E-02 |
| Q9EPX2 | <b>PapIn</b>    | 138.90 | 6.8  | 8 | 8  | 8 | 0.904 | 0.925 | 0.912 | 0.834 | 1.230 | 1.152 | 1.060 | 0.963 | 1.232 | 1.467E-02 |
| Q91WJ7 | <b>Spats2l</b>  | 61.67  | 1.8  | 1 | 1  | 1 | 0.910 | 0.901 | 0.928 | 0.855 | 1.078 | 1.149 | 1.132 | 1.086 | 1.237 | 9.641E-05 |
| Q80ZM8 | <b>Crls1</b>    | 32.50  | 6.6  | 1 | 1  | 1 | 0.843 | 0.950 | 0.942 | 0.878 | 0.930 | 1.063 | 1.307 | 1.180 | 1.240 | 4.278E-02 |
| P02798 | <b>Mt2</b>      | 6.12   | 32.8 | 2 | 3  | 1 | 0.808 | 0.865 | 1.007 | 0.922 | 1.039 | 1.051 | 1.170 | 1.222 | 1.244 | 1.194E-02 |
| O08759 | <b>Ube3a</b>    | 99.82  | 11.4 | 9 | 11 | 9 | 0.859 | 0.865 | 0.873 | 0.982 | 1.198 | 1.093 | 0.980 | 1.183 | 1.244 | 9.320E-03 |
| Q9D0R4 | <b>Ddx56</b>    | 61.21  | 3.5  | 2 | 2  | 2 | 0.903 | 0.886 | 0.859 | 0.920 | 1.063 | 1.172 | 1.009 | 1.219 | 1.251 | 4.226E-03 |
| D3Z1D3 | <b>CEFIP</b>    | 154.48 | 1.7  | 3 | 3  | 3 | 0.850 | 0.997 | 0.968 | 0.748 | 1.104 | 1.188 | 1.066 | 1.105 | 1.253 | 1.156E-02 |
| P53351 | <b>Plk2</b>     | 77.81  | 1.6  | 1 | 1  | 1 | 0.878 | 0.960 | 0.926 | 0.804 | 1.111 | 1.069 | 1.180 | 1.124 | 1.257 | 1.372E-03 |
| Q9Z319 | <b>Corin</b>    | 123.00 | 1.3  | 2 | 2  | 2 | 0.822 | 0.810 | 1.047 | 0.875 | 1.064 | 1.239 | 1.131 | 1.063 | 1.265 | 1.387E-02 |
| Q8K212 | <b>Pacs1</b>    | 104.83 | 8.7  | 6 | 8  | 6 | 0.845 | 0.838 | 0.888 | 0.917 | 1.253 | 1.007 | 1.066 | 1.099 | 1.269 | 5.649E-03 |
| Q923Z3 | <b>Mto1</b>     | 74.33  | 7.3  | 4 | 4  | 4 | 0.849 | 0.926 | 0.785 | 0.968 | 1.201 | 1.090 | 1.296 | 0.898 | 1.271 | 4.485E-02 |
| P50172 | <b>Hsd11b1</b>  | 32.36  | 8.2  | 3 | 3  | 3 | 0.912 | 0.986 | 0.838 | 0.799 | 0.976 | 1.172 | 1.216 | 1.153 | 1.278 | 1.055E-02 |
| Q923D3 | <b>Parm1</b>    | 30.67  | 3.0  | 1 | 1  | 1 | 0.958 | 0.899 | 0.831 | 0.815 | 1.228 | 1.205 | 1.143 | 0.915 | 1.282 | 2.015E-02 |
| Q8BI72 | <b>Cdkn2aip</b> | 59.74  | 4.1  | 2 | 2  | 2 | 1.131 | 0.814 | 0.847 | 0.743 | 1.110 | 1.026 | 1.172 | 1.238 | 1.286 | 3.956E-02 |
| Q9QZ49 | <b>Ubxn8</b>    | 31.56  | 2.9  | 1 | 2  | 1 | 0.978 | 0.988 | 0.793 | 0.723 | 1.160 | 1.325 | 1.022 | 0.981 | 1.289 | 4.927E-02 |
| Q61235 | <b>Sntb2</b>    | 56.38  | 5.8  | 3 | 3  | 3 | 0.774 | 0.877 | 0.985 | 0.886 | 1.110 | 1.095 | 1.157 | 1.184 | 1.291 | 1.733E-03 |
| Q8CBC4 | <b>Cnst</b>     | 76.87  | 3.0  | 2 | 2  | 2 | 0.907 | 0.847 | 0.927 | 0.809 | 1.178 | 1.175 | 1.096 | 1.095 | 1.302 | 3.238E-04 |
| Q61585 | <b>G0s2</b>     | 11.12  | 7.8  | 1 | 2  | 1 | 0.867 | 0.891 | 0.820 | 0.916 | 1.079 | 1.144 | 1.148 | 1.180 | 1.303 | 1.068E-04 |
| Q3V3A7 | <b>Rnf207</b>   | 70.76  | 4.9  | 3 | 3  | 3 | 0.826 | 0.927 | 0.945 | 0.792 | 1.057 | 1.208 | 1.205 | 1.089 | 1.306 | 2.620E-03 |
| Q8JZL7 | <b>Rasgef1b</b> | 55.27  | 2.1  | 1 | 1  | 1 | 0.910 | 0.974 | 0.833 | 0.773 | 1.122 | 1.014 | 1.366 | 1.077 | 1.312 | 2.192E-02 |
| P58308 | <b>Hcrtr2</b>   | 52.46  | 3.5  | 1 | 2  | 1 | 0.956 | 0.860 | 0.784 | 0.840 | 1.275 | 1.273 | 0.999 | 0.984 | 1.317 | 2.221E-02 |
| Q9D938 | <b>Tmem160</b>  | 19.59  | 6.9  | 1 | 1  | 1 | 0.955 | 0.923 | 0.747 | 0.847 | 1.121 | 1.062 | 1.269 | 1.126 | 1.319 | 4.916E-03 |
| Q91ZP3 | <b>Lpin1</b>    | 102.00 | 6.8  | 4 | 4  | 4 | 0.737 | 0.982 | 0.878 | 0.864 | 1.083 | 1.054 | 1.347 | 1.101 | 1.325 | 1.567E-02 |
| Q8VE37 | <b>Rcc1</b>     | 44.93  | 4.5  | 2 | 2  | 2 | 0.755 | 0.935 | 0.872 | 0.901 | 1.127 | 0.921 | 1.189 | 1.398 | 1.338 | 3.232E-02 |

|        |                 |        |      |    |    |    |       |       |       |       |       |       |       |       |       |           |
|--------|-----------------|--------|------|----|----|----|-------|-------|-------|-------|-------|-------|-------|-------|-------|-----------|
| Q9DBG7 | <b>Srpra</b>    | 69.62  | 7.2  | 4  | 4  | 4  | 0.828 | 0.958 | 0.754 | 0.896 | 0.923 | 1.042 | 1.377 | 1.328 | 1.359 | 4.041E-02 |
| Q3THF9 | <b>Coq10b</b>   | 27.27  | 4.2  | 1  | 1  | 1  | 0.852 | 0.826 | 1.019 | 0.715 | 1.154 | 1.221 | 1.273 | 1.000 | 1.362 | 1.165E-02 |
| Q91VS7 | <b>Mgst1</b>    | 17.55  | 8.4  | 1  | 3  | 1  | 0.870 | 0.979 | 0.776 | 0.779 | 1.130 | 1.094 | 1.194 | 1.229 | 1.365 | 1.557E-03 |
| P61014 | <b>Pln</b>      | 6.09   | 23.1 | 2  | 6  | 2  | 0.920 | 0.944 | 0.775 | 0.742 | 1.106 | 1.064 | 1.233 | 1.229 | 1.370 | 3.327E-03 |
| A6BLY7 | <b>Krt28</b>    | 50.35  | 5.2  | 3  | 3  | 1  | 0.914 | 0.843 | 0.789 | 0.794 | 0.986 | 0.891 | 1.331 | 1.370 | 1.371 | 4.704E-02 |
| Q91WD2 | <b>Trpv6</b>    | 87.39  | 1.6  | 1  | 1  | 1  | 0.824 | 0.813 | 0.873 | 0.911 | 0.990 | 1.073 | 1.321 | 1.310 | 1.372 | 1.048E-02 |
| Q3U276 | <b>Sdhaf1</b>   | 13.14  | 6.8  | 1  | 1  | 1  | 0.960 | 0.877 | 0.763 | 0.793 | 1.212 | 1.068 | 1.077 | 1.299 | 1.372 | 4.421E-03 |
| Q9CQ86 | <b>Mien1</b>    | 12.30  | 7.8  | 1  | 1  | 1  | 0.897 | 0.851 | 0.812 | 0.819 | 1.220 | 1.183 | 1.209 | 1.036 | 1.376 | 5.096E-04 |
| Q91V09 | <b>Wdr13</b>    | 53.66  | 4.7  | 2  | 2  | 2  | 0.931 | 0.897 | 0.725 | 0.819 | 1.205 | 1.177 | 1.120 | 1.143 | 1.378 | 6.664E-04 |
| Q8R4S0 | <b>Ppp1r14c</b> | 17.75  | 22.6 | 2  | 3  | 2  | 0.869 | 0.786 | 0.829 | 0.894 | 1.117 | 1.492 | 1.141 | 0.904 | 1.378 | 4.224E-02 |
| P35505 | <b>Fah</b>      | 46.18  | 16.0 | 6  | 8  | 6  | 0.885 | 0.898 | 0.783 | 0.841 | 1.120 | 1.128 | 1.232 | 1.216 | 1.378 | 1.698E-04 |
| Q9Z2A9 | <b>Ggt5</b>     | 61.67  | 5.4  | 4  | 5  | 4  | 0.802 | 0.771 | 0.864 | 0.936 | 1.381 | 1.050 | 1.078 | 1.150 | 1.381 | 8.449E-03 |
| Q8VC19 | <b>Alas1</b>    | 71.02  | 6.4  | 4  | 4  | 4  | 0.791 | 0.949 | 0.760 | 0.848 | 1.144 | 1.331 | 1.091 | 1.077 | 1.387 | 4.063E-03 |
| P35969 | <b>Flt1</b>     | 149.87 | 0.8  | 1  | 1  | 1  | 0.955 | 0.958 | 0.754 | 0.687 | 1.149 | 1.248 | 1.222 | 1.047 | 1.391 | 7.437E-03 |
| Q9JIF9 | <b>Myot</b>     | 55.32  | 31.7 | 14 | 19 | 14 | 0.809 | 0.843 | 0.862 | 0.829 | 1.226 | 1.237 | 1.103 | 1.096 | 1.395 | 1.675E-04 |
| Q6P5D8 | <b>Smchd1</b>   | 225.65 | 1.5  | 3  | 3  | 3  | 0.804 | 0.989 | 0.783 | 0.761 | 1.316 | 1.136 | 1.086 | 1.128 | 1.398 | 3.908E-03 |
| P59672 | <b>Anks1a</b>   | 125.24 | 3.7  | 3  | 4  | 3  | 0.685 | 0.776 | 0.875 | 1.001 | 1.316 | 1.168 | 1.120 | 1.081 | 1.404 | 7.445E-03 |
| Q9QY15 | <b>Dnajb2</b>   | 35.59  | 15.7 | 5  | 7  | 4  | 0.900 | 0.765 | 0.722 | 0.944 | 1.372 | 0.957 | 1.254 | 1.137 | 1.417 | 1.511E-02 |
| Q3UV17 | <b>Krt76</b>    | 62.84  | 4.2  | 3  | 2  | 1  | 0.750 | 0.662 | 0.813 | 0.807 | 1.099 | 1.106 | 1.478 | 1.447 | 1.692 | 3.080E-03 |

Supplemental Table 3. Key Reagents

| REAGENT               | SOURCE                    | IDENTIFIER                      |
|-----------------------|---------------------------|---------------------------------|
| <b>Antibodies</b>     |                           |                                 |
| Anti-mouse PD-1       | BioXcell                  | Cat#BE0273, RRID:AB_2687796     |
| Anti-mouse Ctlα4      | BioXcell                  | Cat #BE0164, RRID:AB_10949609   |
| Anti-normal IgG       | BioXcell                  | Cat#BE0083, RRID:AB_110778      |
| Anti-GSDME            | Abcam                     | Cat#ab215191, RRID:AB_2737000   |
| Anti-GSDME-N terminal | Abcam                     | Cat#ab222407, RRID:AB_2923216   |
| Anti-GSDMD            | Abcam                     | Cat#ab209845, RRID:AB_2783550   |
| Anti-Caspase-1        | Abcam                     | Cat#ab179515, RRID:AB_2884954   |
| Anti-Caspase-3        | Santa Cruz Biotechnolog   | Cat#sc-373730, RRID:AB_10918110 |
| Anti-Caspase-8        | Cell signaling technology | Cat#4927, RRID: AB_2068301      |
| Anti-Caspase-9        | Abcam                     | Cat#ab202068, RRID: AB_2889070  |
| Anti-Caspase-11       | Abcam                     | Cat#ab180673, RRID:AB_2923217   |
| Anti-Nos2             | Cell signaling technology | Cat #13120, RRID:AB_2687529     |
| Anti-IL-1β            | Santa Cruz Biotechnology  | Cat#sc-52012, RRID:AB_629741    |
| Anti-cGAS             | Cell signaling technology | Cat#31659, RRID:AB_2799008      |
| Anti-STING            | Cell signaling technology | Cat#13647, RRID:AB_2732796      |
| Anti-IRF3             | Cell signaling technology | Cat#4302, RRID:AB_1904036       |
| Anti-p-IRF3           | Cell signaling technology | Cat#29047, RRID:AB_2773013      |
| Anti-TBK1             | Cell signaling technology | Cat#38066, RRID:AB_2827657      |
| Anti-p-TBK1           | Cell signaling technology | Cat#5483, RRID:AB_10693472      |
| Anti-β-Tubulin        | Cell signaling technology | Cat#2128, RRID:AB_823664        |
| Anti-CD3              | Abcam                     | Cat#ab16669, RRID:AB_443425     |
| Anti-CD4              | Abcam                     | Cat#ab183685, RRID:AB_2686917   |
| Anti-CD8              | Abcam                     | Cat#ab217344, RRID:AB_2890649   |
| Anti-CD68             | Cell signaling technology | Cat#97778, RRID:AB_2928056      |
| Anti-IFN-γ            | Thermo Fisher Scientific  | Cat#14-7311-81, RRID:AB_468467  |
| Anti-Myh6             | Thermo Fisher Scientific  | Cat# MA5-27819, RRID:AB_2735280 |
| Anti-IFN-γ-FITC       | BioLegend                 | Cat#505806, RRID:AB_315400      |

|                                                      |                                  |                                  |
|------------------------------------------------------|----------------------------------|----------------------------------|
| Anti-STING                                           | Novus                            | Cat#NBP2-24683, RRID: AB_2868483 |
| Anti-MPO-FITC                                        | Thermo Fisher Scientific         | Cat#11-1299-42, RRID:AB_10596801 |
| Anti-CXCR2-APC                                       | BioLegend                        | Cat#149312, RRID:AB_2728185      |
| Anti-CD68-APC                                        | BioLegend                        | Cat#137008, RRID:AB_10575300     |
| Anti-CD45-PerCP/Cyanine5.5                           | BioLegend                        | Cat#103132, RRID:AB_893340       |
| Anti-CD3-FITC                                        | BioLegend                        | Cat#100204, RRID:AB_312661       |
| Anti-CD4-AF700                                       | BioLegend                        | Cat#116022, RRID:AB_2715958      |
| Anti-IFN- $\gamma$ -BV650                            | BioLegend                        | Cat#505832, RRID:AB_2734492      |
| Anti-IL-4-BV421                                      | BioLegend                        | Cat#504119, RRID:AB_10896945     |
| Anti-IL-17A-BV605                                    | BD Biosciences                   | Cat#564169, RRID:AB_2738640      |
| Anti-CD11b-APC/Fire750                               | BioLegend                        | Cat#101261, RRID:AB_2572121      |
| Anti-CD8a-APC/Cyanine7                               | BioLegend                        | Cat#100714, RRID:AB_312753       |
| Anti-CD62L-PE/Cyanine7                               | BioLegend                        | Cat#104418, RRID:AB_313103       |
| Anti-CD44-PE/Dazzle™ 594                             | BioLegend                        | Cat#103056, RRID:AB_2564044      |
| Anti-TCR $\gamma/\delta$ - PE                        | BioLegend                        | Cat#118108, RRID:AB_313832       |
| Anti-CD45-BV605                                      | BioLegend                        | Cat#103139, RRID:AB_2562341      |
| Anti-CD3-APC                                         | BioLegend                        | Cat#100236, RRID:AB_2561456      |
| Anti-CD11B-BB515                                     | BD Biosciences                   | Cat#564454, RRID:AB_2665392      |
| Anti-LY6G-BV421                                      | BD Biosciences                   | Cat#562737, RRID:AB_2737756      |
| Anti-F4/80-APC-R700                                  | BD Biosciences                   | Cat#565787, RRID:AB_2869711      |
| Anti-CCR2-BV650                                      | BioLegend                        | Cat#150613, RRID:AB_2721553      |
| Anti-MHC-II-APC/Fire750                              | BioLegend                        | Cat#107651, RRID:AB_2616728      |
| Anti-Ly6C-PE                                         | BioLegend                        | Cat#128007, RRID:AB_1186133      |
| Anti-CD64- PE/Cyanine7                               | BioLegend                        | Cat#139314, RRID: AB_2563904     |
| IRDye 800CW Goat anti-Mouse IgG antibody             | LI-COR                           | Cat#926-32210, RRID:AB_621842    |
| IRDye 800CW Goat anti-Rabbit IgG antibody            | LI-COR                           | Cat#925-32211, RRID:AB_2651127   |
| Alexa Fluor 488-conjugated goat anti-rabbit IgG      | Thermo Fisher Scientific         | Cat#A-11034, RRID:AB_2576217     |
| Alexa Fluor 568-conjugated goat anti-mouse IgG       | Thermo Fisher Scientific         | Cat#A-21134, RRID:AB_2535773     |
| <b>Biological Samples</b>                            |                                  |                                  |
| Serum samples cancer patients treated with ICI       | Shanghai Changzheng Hospital     | Approval number: 2017SL016       |
| Serum samples cancer patients treated with ICI       | Shanghai Tenth People's Hospital | Approval number: 2019-K-032      |
| <b>Chemicals, Peptides, and Recombinant Proteins</b> |                                  |                                  |

|                                                   |                          |                  |
|---------------------------------------------------|--------------------------|------------------|
| TRIzol                                            | Thermo Fisher Scientific | 15596026         |
| WGA                                               | Thermo Fisher Scientific | W11261           |
| DAPI                                              | Thermo Fisher Scientific | D1306            |
| PI                                                | Sigma                    | 25535-16-4       |
| MitoSOX                                           | Thermo Fisher Scientific | M36008           |
| Normal Goat Serum                                 | Thermo Fisher Scientific | 31872            |
| Sirius Red                                        | Sigma-Aldrich            | 365548           |
| Prestained Protein Marker                         | GeneTex                  | GTX50875         |
| Collagenase II                                    | Worthington              | LS004176         |
| RBC lysis buffer                                  | eBiosciences             | 00-4333-57       |
| DNase I                                           | Sigma                    | 10104159001      |
| DMF                                               | Sigma                    | 242926           |
| Protease and phosphatase inhibitors               | Sigma                    | PPC1010          |
| DL1000 DNA ladder                                 | Takara Bio               | 3591A            |
| DL2000 DNA ladder                                 | Takara Bio               | 3427A            |
| PrimeScript™ RT Master Mix                        | Takara Bio               | RR036A           |
| TB Green® Premix Ex Taq™ II                       | Takara Bio               | RR820Q           |
| TransScript® First-Strand cDNA Synthesis SuperMix | TransGen Biotech         | AT301-02         |
| <b>Critical Commercial Assays</b>                 |                          |                  |
| Human/Mouse GSDME ELISA Kit                       | Adipogen Life Sciences   | AG-45B-0024-KI01 |
| Mouse IL-1β ELISA kit                             | R&D systems              | MLB00C           |
| Mouse IL-18 ELISA Kit                             | R&D systems              | 7625             |
| Mouse IL-6 ELISA Kit                              | R&D systems              | M6000B           |
| Mouse cTnT ELISA Kit                              | Sangon Biotech           | D721161-0096     |
| Mouse cTnI ELISA Kit                              | Sangon Biotech           | D721149-0096     |
| Mouse CK-MB ELISA Kit                             | Sangon Biotech           | D721065-0096     |
| Mouse Caspase1 ELISA Kit                          | Beyotime Biotechnology   | C1102            |
| Mouse Caspase3 ELISA Kit                          | Beyotime Biotechnology   | C1116            |
| Mouse Caspase8 ELISA Kit                          | Beyotime Biotechnology   | C1152            |
| Mouse Caspase9 ELISA Kit                          | Beyotime Biotechnology   | C1158            |
| Mitochondria isolation Kit                        | Sigma-Aldrich            | MITOISO1         |

|                                                                                 |                          |                  |
|---------------------------------------------------------------------------------|--------------------------|------------------|
| In situ Cell Death Detection Kit, Fluorescein                                   | Merck                    | 11684795910      |
| Mitochondrial complex I ELISA kit                                               | Abcam                    | ab287847         |
| NAD <sup>+</sup> Assay Kit                                                      | Abcam                    | ab65348          |
| Mitochondrial complex IV ELISA kit                                              | Solarbio                 | BC0945           |
| ATP assay kit                                                                   | Solarbio                 | BC0300           |
| GSH assay kit                                                                   | Solarbio                 | BC1175           |
| BCA protein assay kit                                                           | Beyotime Biotechnology   | P0011            |
| Tandem Mass Tag Multiplexed Labelling System                                    | Thermo Fisher Scientific | N/A              |
| Quant-iT PicoGreen dsDNA Kits                                                   | Thermo Fisher Scientific | P11495           |
| <b>Deposited Data</b>                                                           |                          |                  |
| Tandem Mass Tag Multiplexed quantitative proteomics                             | iProx database           | IPX0004084000    |
| <b>Experimental Models: Organisms/Strains</b>                                   |                          |                  |
| Mouse: <i>Lysm-Cre</i> : B6.129P2- <i>Lyz2</i> <sup>tm1(cre)lfo</sup> /J        | The Jackson Laboratory   | JAX stock 004781 |
| Mouse: <i>Myh6-Cre</i> : B6.FVB-Tg <sup>Myh6-(cre)2182Mds</sup> /J              | The Jackson Laboratory   | JAX stock 011038 |
| Mouse: <i>Sting</i> <sup>gt/gt</sup> : C57BL/6J- <i>Sting1</i> <sup>gt</sup> /J | The Jackson Laboratory   | JAX stock 017537 |
| Mouse: <i>Gsdme</i> <sup>stop/stop</sup>                                        | This study               | N/A              |
| Mouse: <i>Gsdme</i> <sup>-/-</sup>                                              | This study               | N/A              |
| <b>Experimental Models: Cell Lines</b>                                          |                          |                  |



|                                             |            |                        |
|---------------------------------------------|------------|------------------------|
| Cell: MC38 mouse colon adenocarcinoma cells | Kerafast   | N/A                    |
| <b>Oligonucleotides</b>                     |            |                        |
| Primers for mouse <i>Caspase-1</i> Forward  | This study | AGGCACGGGACCTATGTGAT   |
| Primers for mouse <i>Caspase-1</i> Reverse  | This study | AGGGCAAACCTTGAGGGTCC   |
| Primers for mouse <i>Caspase-3</i> Forward  | This study | GAGCTTGGAACGGTACGCTA   |
| Primers for mouse <i>Caspase-3</i> Reverse  | This study | CCGTACCAGAGCGAGATGAC   |
| Primers for mouse <i>Caspase-8</i> Forward  | This study | TTCGGAGGCATTTCTGTCCC   |
| Primers for mouse <i>Caspase-8</i> Reverse  | This study | CGGCTCACAGAGGTTTGCTA   |
| Primers for mouse <i>Caspase-9</i> Forward  | This study | ACCTTCCCAGGTTGCCAATG   |
| Primers for mouse <i>Caspase-9</i> Reverse  | This study | GCTGCTAGGAGCATGTTTGC   |
| Primers for mouse <i>Caspase-11</i> Forward | This study | GGCTACGATGTGGTGGTGAA   |
| Primers for mouse <i>Caspase-11</i> Reverse | This study | AGGCCTGCACAATGATGACT   |
| Primers for mouse <i>Gsdma</i> Forward      | This study | GCACCCACTAAGCCCATCTC   |
| Primers for mouse <i>Gsdma</i> Reverse      | This study | CACACATGGGAAGGATCAGACT |
| Primers for mouse <i>Gsdmc</i> Forward      | This study | TCGGACCTGCTAAAAGGAAGG  |
| Primers for mouse <i>Gsdmc</i> Reverse      | This study | AGCCAACCGGGAAGAAGTTT   |
| Primers for mouse <i>Gsdmd</i> Forward      | This study | GATCAAGGAGGTAAGCGGCA   |
| Primers for mouse <i>Gsdmd</i> Reverse      | This study | CACTCCGGTTCTGGTTCTGG   |
| Primers for mouse <i>Gsdme</i> Forward      | This study | GGTGGGATACAGGATACAAGGA |
| Primers for mouse <i>Gsdme</i> Reverse      | This study | GCAGCACAGCGAAGAAATAAC  |
| Primers for mouse <i>Tnnt2</i> Forward      | This study | GTGTGCAGTCCCTGTTTCTG   |
| Primers for mouse <i>Tnnt2</i> Reverse      | This study | GCTTGGGTTTGGTGTCTCT    |
| Primers for mouse <i>Tnni3</i> Forward      | This study | TGTCCTCGCCCCTTATCTCA   |

|                                         |            |                         |
|-----------------------------------------|------------|-------------------------|
| Primers for mouse <i>Tnni3</i> Reverse  | This study | GGTCCCCAGCCGCATC        |
| Primers for mouse <i>Icam1</i> Forward  | This study | TTCTCATGCCGCACAGAACT    |
| Primers for mouse <i>Icam1</i> Reverse  | This study | TCCTGGCCTCGGAGACATTA    |
| Primers for mouse <i>Vav2</i> Forward   | This study | ACAGAGCAAAGGGATCAGGC    |
| Primers for mouse <i>Vav2</i> Reverse   | This study | CCCATTTTCATGGGCTGCTG    |
| Primers for mouse <i>Sell</i> Forward   | This study | GACATGGGTGGGAACCAACA    |
| Primers for mouse <i>Sell</i> Reverse   | This study | CACTGGACCACTGTGTAGCA    |
| Primers for mouse <i>Myh6</i> Forward   | This study | ATAAAGGGGCTGGAGCACTG    |
| Primers for mouse <i>Myh6</i> Reverse   | This study | GCCTCTAGGCGTTCCTTCTC    |
| Primers for mouse <i>Ptprc</i> Forward  | This study | GGCGCATCAGAAGGGGATAA    |
| Primers for mouse <i>Ptprc</i> Reverse  | This study | GCTGTTGCAAATGTGCTGCT    |
| Primers for mouse <i>Cxcl1</i> Forward  | This study | ACTCAAGAATGGTCGCGAGG    |
| Primers for mouse <i>Cxcl1</i> Reverse  | This study | GTGCCATCAGAGCAGTCTGT    |
| Primers for mouse <i>Ccr2</i> Forward   | This study | GCCATCATAAAGGAGCCATAACC |
| Primers for mouse <i>Ccr2</i> Reverse   | This study | ATGCCGTGGATGAACTGAGG    |
| Primers for mouse <i>Cxcr2</i> Forward  | This study | CTCTGCTCACAAACAGCGTC    |
| Primers for mouse <i>Cxcr2</i> Reverse  | This study | TCTCTGAGTGGCATGGGACA    |
| Primers for mouse $\alpha$ -SMA Forward | This study | GTACCCAGGCATTGCTGACA    |
| Primers for mouse $\alpha$ -SMA Reverse | This study | GCTGGAAGGTAGACAGCGAA    |
| Primers for mouse <i>mt-Nd1</i> Forward | This study | CACCCAAGAACAGGGTTTGT    |
| Primers for mouse <i>mt-Nd1</i> Reverse | This study | TGGCCATGGGTATGTTGTTAA   |
| Primers for mouse <i>D-loop</i> Forward | This study | CTATCACCCCTATTAACCACTCA |
| Primers for mouse <i>D-loop</i> Reverse | This study | TTCGCCTGTAATATTGAACGTA  |

|                                                             |            |                          |
|-------------------------------------------------------------|------------|--------------------------|
| Primers for mouse <i>18S</i><br>Forward                     | This study | CTACCACATCCAAGGAAGC      |
| Primers for mouse <i>18S</i><br>Reverse                     | This study | TTTTCGTCACTACCTCCCCG     |
| Primers for mouse <i>Col1a1</i><br>Forward                  | This study | TTCTCCTGGCAAAGACGGAC     |
| Primers for mouse <i>Col1a1</i><br>Reverse                  | This study | CTCAAGGTCACGGTCACGAA     |
| Primers for mouse<br><i>Col3a1</i> Forward                  | This study | GAGGAATGGGTGGCTATCCG     |
| Primers for mouse<br><i>Col3a1</i> Reverse                  | This study | TCGTCCAGGTCTTCTGACT      |
| Primers for mouse <i>Axl</i><br>Forward                     | This study | TTCAACTGTGCTACGTCCCC     |
| Primers for mouse <i>Axl</i><br>Reverse                     | This study | GGGTCCCTCTAGGTAAGCCA     |
| Primers for mouse<br><i>Nos2</i> Forward                    | This study | AACAGGGAGAAAGCGCAAAAC    |
| Primers for mouse<br><i>Nos2</i> Reverse                    | This study | TCCACTGCCCCAGTTTTTGA     |
| Primers for mouse <i>H2-DMa</i><br>Forward                  | This study | AGGGGGTATATGGAGCACTCT    |
| Primers for mouse <i>H2-DMa</i><br>Reverse                  | This study | CGCAGCAGGTCTCTCGTTTT     |
| Primers for mouse <i>GzmB</i><br>Forward                    | This study | GAAGCCAGGAGATGTGTGCT     |
| Primers for mouse <i>GzmB</i><br>Reverse                    | This study | GCACGTTTGGTCTTTGGGTC     |
| Primers for mouse <i>Prf1</i><br>Forward                    | This study | TCTTGGTGGGACTTCAGCTT     |
| Primers for mouse <i>Prf1</i><br>Reverse                    | This study | TGCTTGCATTCTGACCGAGT     |
| Primers for mouse <i>IFN-<math>\gamma</math></i><br>Forward | This study | CGGCACAGTCATTGAAAGCC     |
| Primers for mouse <i>IFN-<math>\gamma</math></i><br>Reverse | This study | TGCATCCTTTTTCGCCTTGC     |
| Primers for mouse <i>IL-2</i><br>Forward                    | This study | GCCCCAAGGGCTCAAAAATG     |
| Primers for mouse <i>IL-2</i><br>Reverse                    | This study | GCGCTTACTTTGTGCTGTCC     |
| Primers for mouse <i>IL-17A</i><br>Forward                  | This study | GCTGACCCCTAAGAAACCCC     |
| Primers for mouse <i>IL-17A</i><br>Reverse                  | This study | GAAGCAGTTTGGGACCCCTT     |
| Primers for mouse <i>IL-6</i><br>Forward                    | This study | ATGAAGTTCCTCTCTGCAAGAGAC |
| Primers for mouse <i>IL-6</i><br>Reverse                    | This study | CACTAGGTTTGCCGAGTAGATCTC |

|                                            |            |                           |
|--------------------------------------------|------------|---------------------------|
| Primers for mouse <i>IL-18</i><br>Forward  | This study | GTAAGAGGACTGGCTGTGACCC    |
| Primers for mouse <i>IL-18</i><br>Reverse  | This study | CTTTTGGCAAGCAAGAAAGTGT    |
| Primers for mouse <i>IL-1 β</i><br>Forward | This study | TGCCACCTTTTGACAGTGATG     |
| Primers for mouse <i>IL-1 β</i><br>Reverse | This study | AAGGTCCACGGGAAAGACAC      |
| Primers for mouse <i>Elane</i><br>Forward  | This study | CTTCATCCGAGGAGGCTGTG      |
| Primers for mouse <i>Elane</i><br>Reverse  | This study | GAGGTCTCTGGTAGAGGGGG      |
| Primers for mouse <i>Padi4</i><br>Forward  | This study | CCTACAGGTGAAAGCAGCCA      |
| Primers for mouse <i>Padi4</i><br>Reverse  | This study | TCAAAGTCCATTCCGGAGGC      |
| Primers for mouse <i>IL-4</i><br>Forward   | This study | CCATATCCACGGATGCGACA      |
| Primers for mouse <i>IL-4</i><br>Reverse   | This study | AAGCCCGAAAGAGTCTCTGC      |
| Primers for mouse <i>IL-10</i><br>Forward  | This study | GCTCCAAGACCAAGGTGTCT      |
| Primers for mouse <i>IL-10</i><br>Reverse  | This study | CGGAGAGAGGTACAAACGAGG     |
| Primers for mouse <i>Ccr5</i><br>Forward   | This study | GCAGTTTCGGAGCAGTGTTG      |
| Primers for mouse <i>Ccr5</i><br>Reverse   | This study | ACATGTGCACAGAAATCCCAG     |
| Primers for mouse <i>Ii22</i><br>Forward   | This study | TGCGATCTCTGATGGCTGTC      |
| Primers for mouse <i>Ii22</i><br>Reverse   | This study | CCTCGGAACAGTTTCTCCCC      |
| Primers for mouse <i>Tnfa</i><br>Forward   | This study | AGGCACTCCCCCAAAGATG       |
| Primers for mouse <i>Tnfa</i><br>Reverse   | This study | CCACTTGGTGGTTTGTGAGTG     |
| Primers for mouse <i>Ccl5</i><br>Forward   | This study | TGCTCCAATCTTGCAGTCGT      |
| Primers for mouse <i>Ccl5</i><br>Reverse   | This study | GCAAGCAATGACAGGGAAGC      |
| Primers for mouse <i>Gapdh</i><br>Forward  | This study | CCCATCACCATCTTCCAGGAG     |
| Primers for mouse <i>Gapdh</i><br>Reverse  | This study | TTCACCACCTTCTTCTTGATGTCAT |

### Software and Algorithms

|                          |                                  |                                                                                                                                             |
|--------------------------|----------------------------------|---------------------------------------------------------------------------------------------------------------------------------------------|
| GraphPad Prism version 8 | GraphPad software                | <a href="https://www.graphpad.com/">https://www.graphpad.com/</a> ,<br>RRID:SCR_002798                                                      |
| FlowJo v.10              | FlowJo, LLC                      | <a href="https://www.flowjo.com/solutions/flowjo">https://www.flowjo.com/solutions/flowjo</a><br>, RRID:SCR_008520                          |
| Image J                  | National Institutes<br>of Health | <a href="https://imagej.nih.gov/ij/">https://imagej.nih.gov/ij/</a> ,<br>RRID:SCR_003070                                                    |
| Vevo 2100 v3.1.1         | VisualSonics                     | <a href="https://www.visualsonics.com/product/imaging-systems/vevo-2100">https://www.visualsonics.com/product/imaging-systems/vevo-2100</a> |

2

3

**Supplemental Table 4. Gating strategy for flow cytometry**

| Flow cytometry plot in Figures                                                                       | Gating strategies                            |
|------------------------------------------------------------------------------------------------------|----------------------------------------------|
| <p><b>D</b></p> 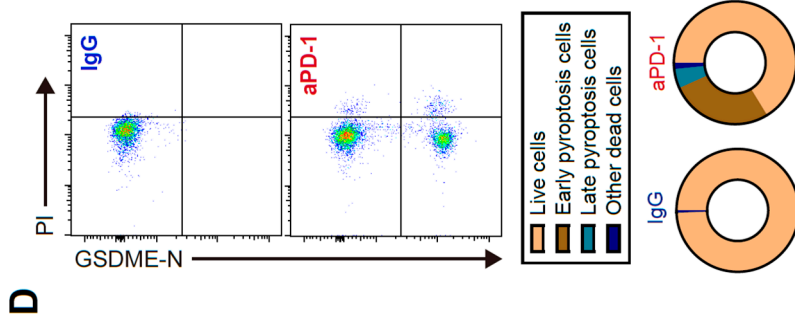   | <p>(Figure 1D)<br/>Gated on single cells</p> |
| <p><b>G</b></p>   | <p>(Figure 1G)<br/>Gated on single cells</p> |
| <p><b>D</b></p>  | <p>(Figure 3D)<br/>Gated on single cells</p> |

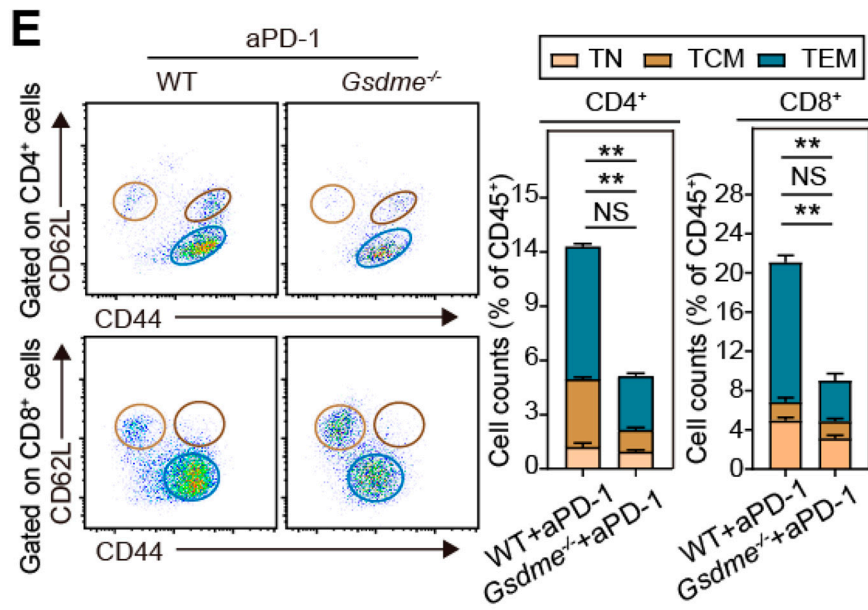

(Figure 3E up)  
Gated on CD4<sup>+</sup>CD3<sup>+</sup>CD4<sup>+</sup> cells

(Figure 3E below)  
Gated on CD4<sup>+</sup>CD3<sup>+</sup>CD8<sup>+</sup> cells

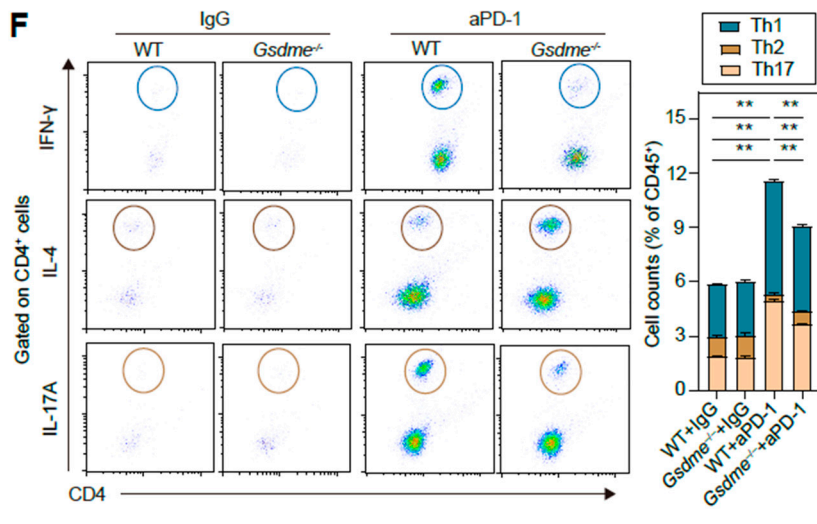

(Figure 3F)  
Gated on CD4<sup>+</sup>CD4<sup>+</sup> cells

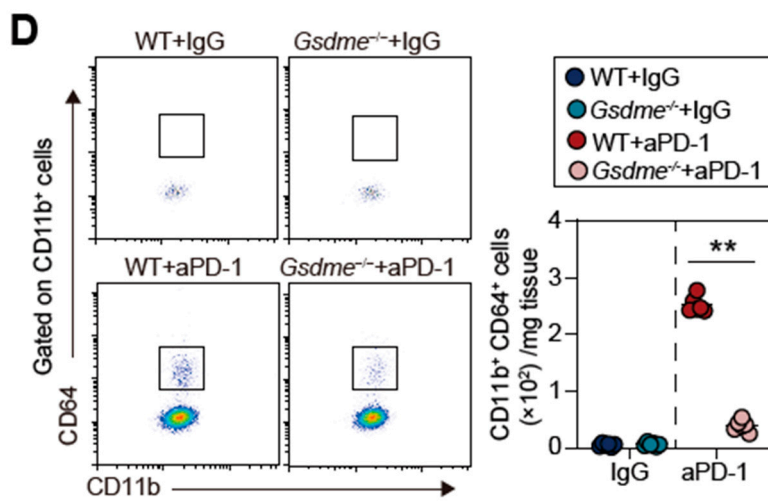

(Figure 4D)  
Gated on CD4<sup>+</sup>CD11b<sup>+</sup> cells

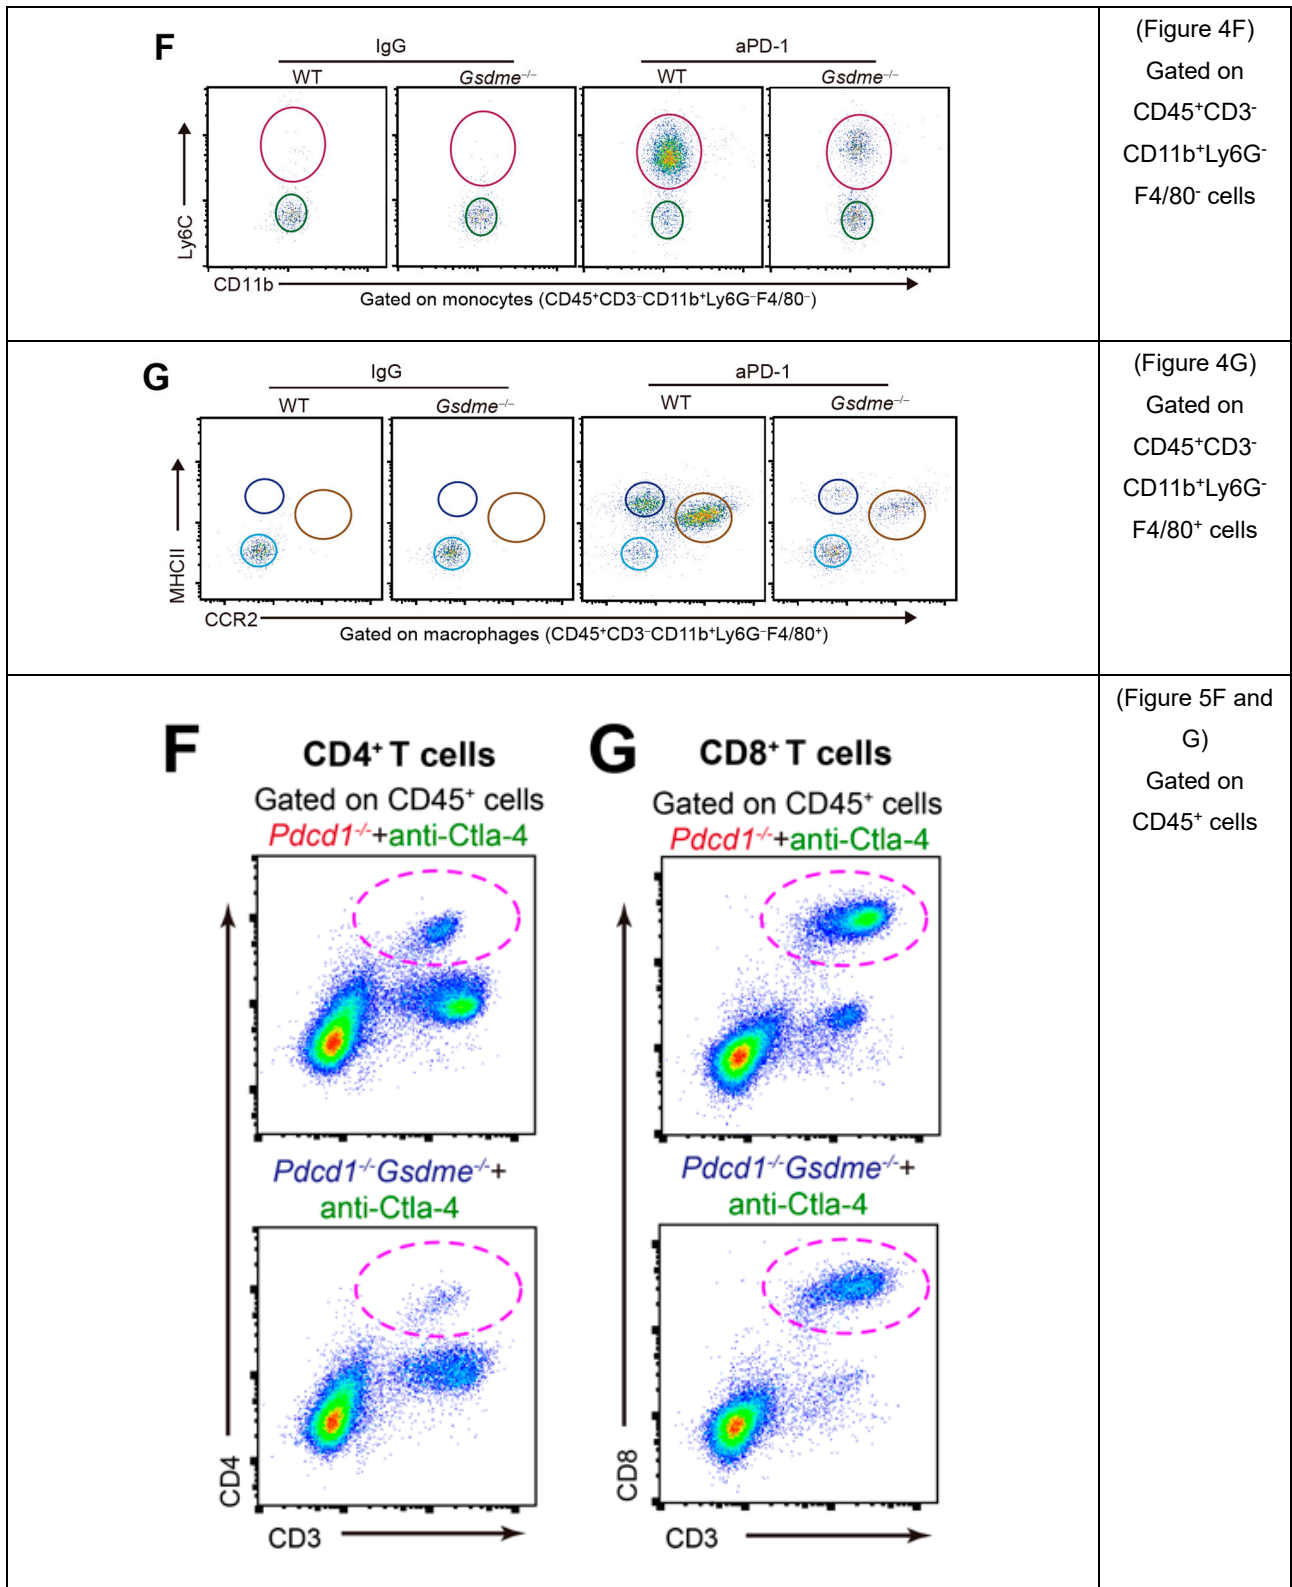



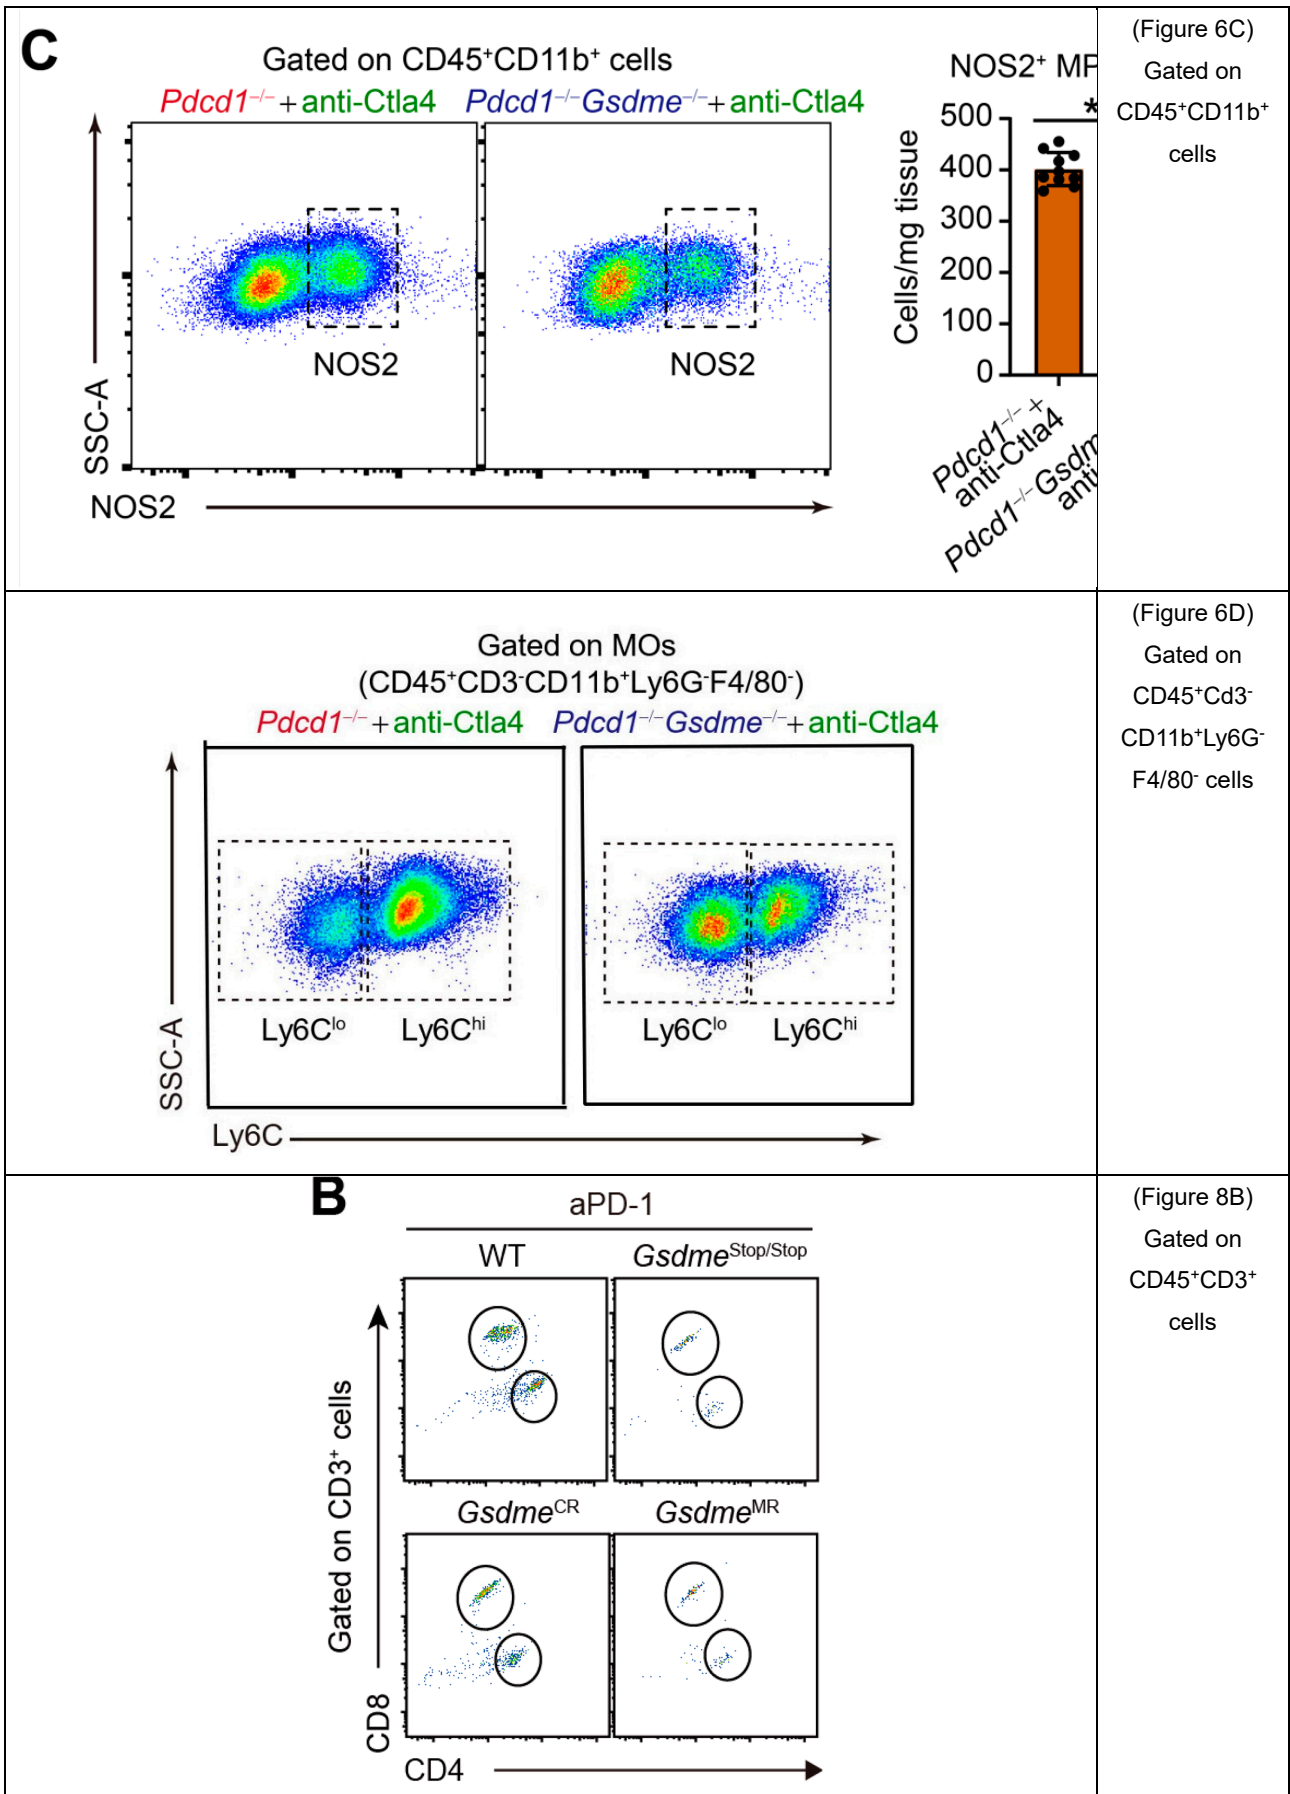

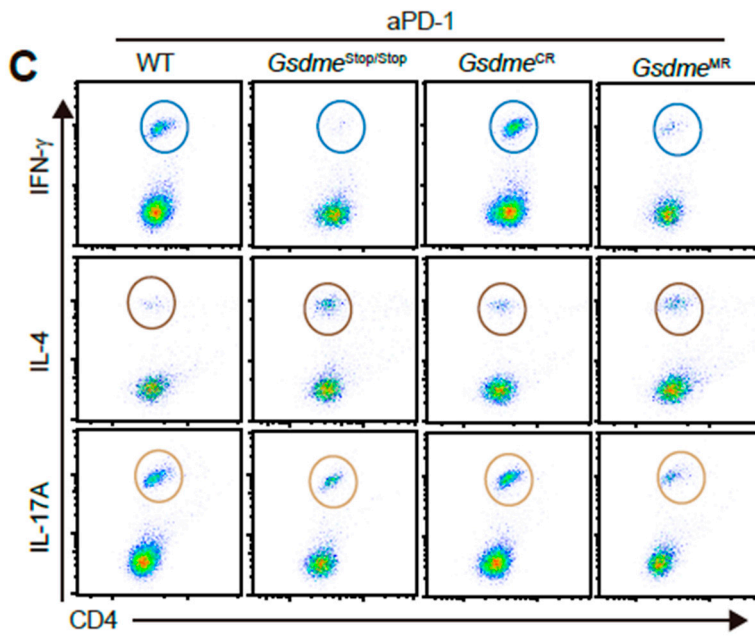

(Figure 8C)  
Gated on  
CD45<sup>+</sup>CD4<sup>+</sup>  
cells

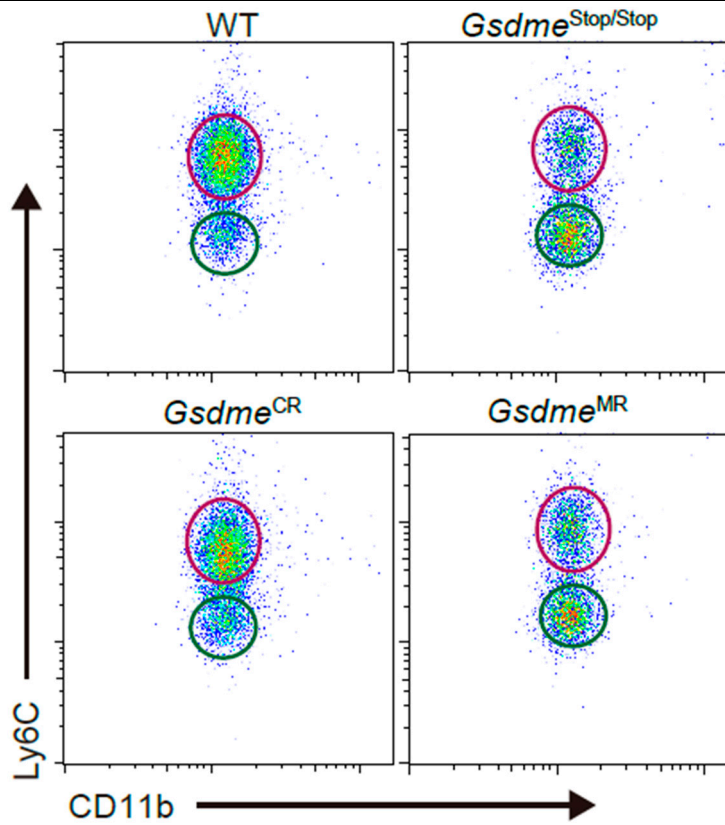

(Figure 8F)  
Gated on  
CD45<sup>+</sup>CD3<sup>-</sup>  
CD11b<sup>+</sup>Ly6C<sup>-</sup>  
F4/80<sup>-</sup> cells

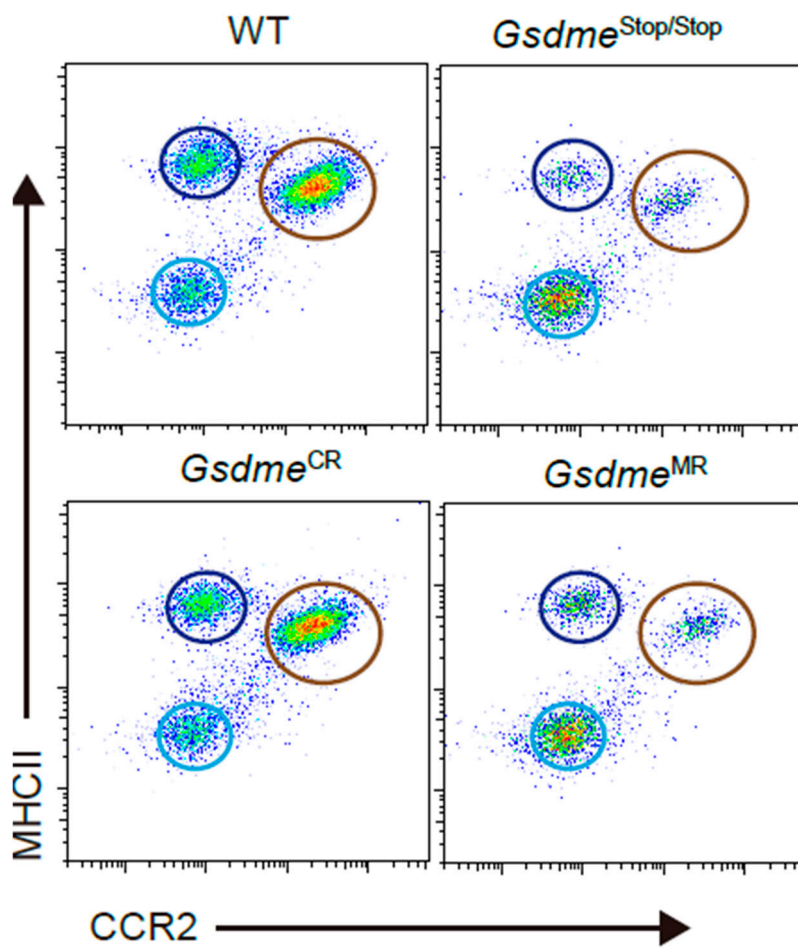

(Figure 8G)  
Gated on  
CD45<sup>+</sup>CD3<sup>-</sup>  
CD11b<sup>+</sup>Ly6G<sup>-</sup>  
F4/80<sup>+</sup> cells

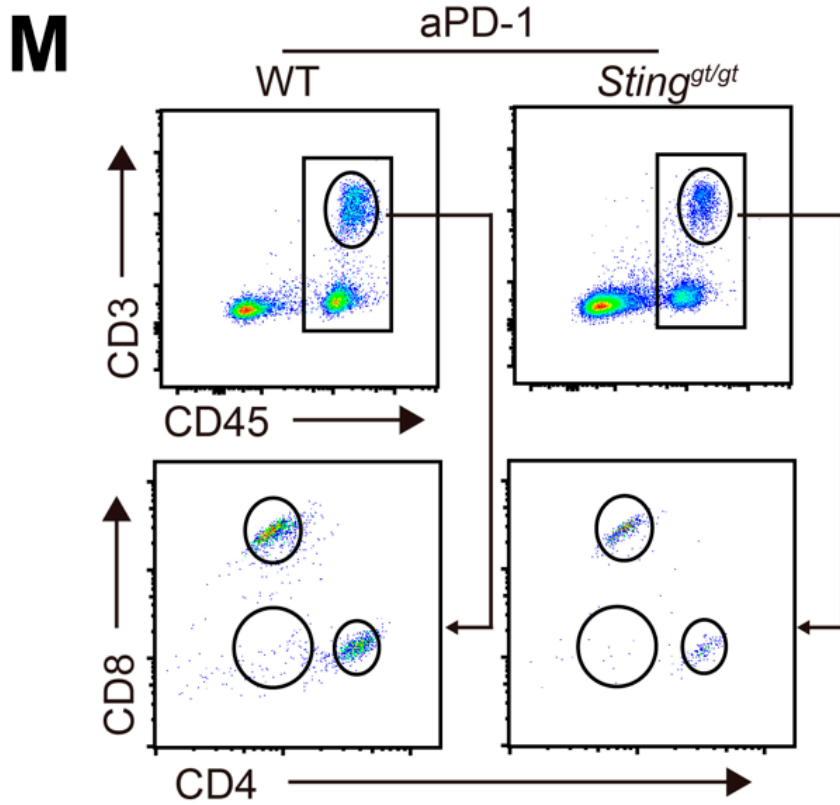

(Figure 9M)  
Gated on  
single cells

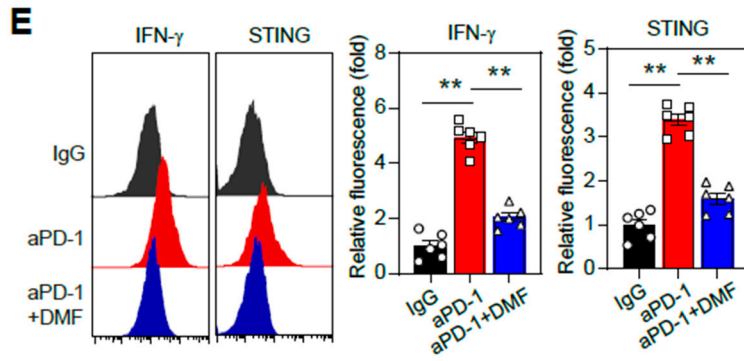

(Figure 9E)  
Gated on  
single cells

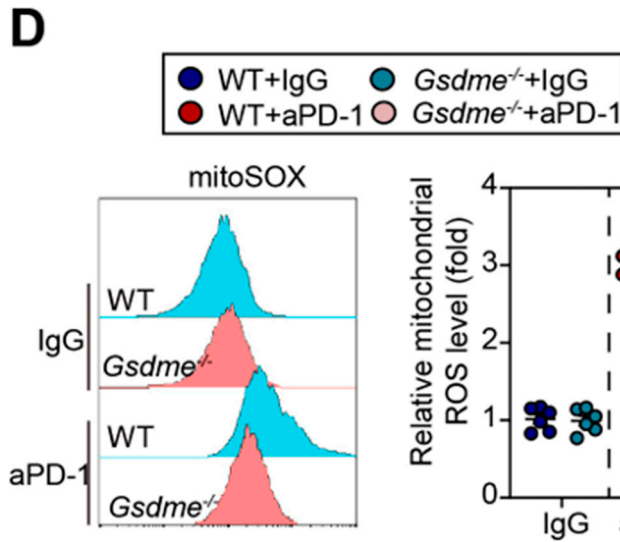

(Supplemental  
Figure 4D)  
Gated on  
single cells

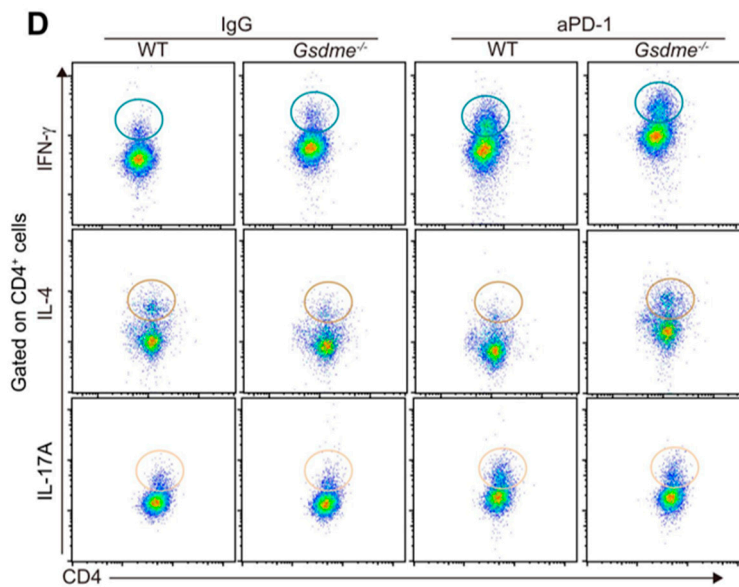

(Supplemental  
Figure 6 D)  
Gated on  
CD45<sup>+</sup>CD4<sup>+</sup>  
cells

**A**

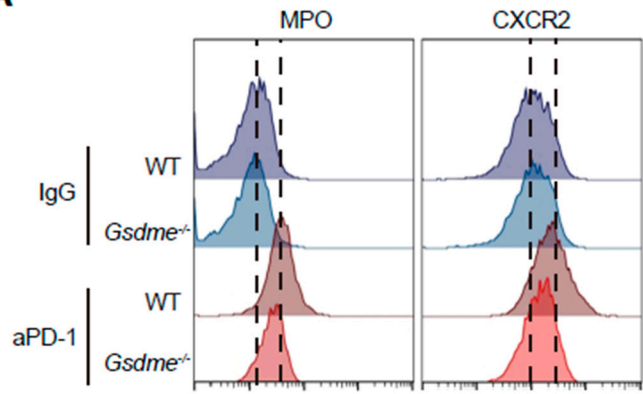

(Supplemental Figure 7 A)  
Gated on single cells

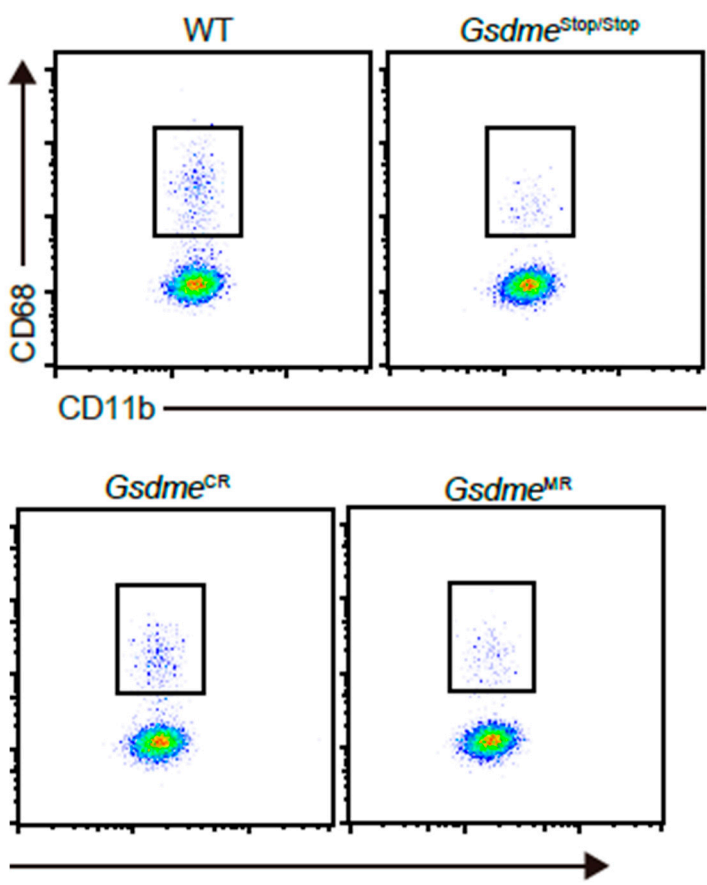

(Supplemental Figure 13B)  
Gated on CD45<sup>+</sup>CD11b<sup>+</sup> cells
